# Supplementary material
Source: publisher figshare collection journal article supplement (https://rs.figshare.com/ndownloader/files/9527695)
Supplement: Supplementary file 1 [file 9527695]

## Sheet: Pterosaur data
Table S1: List of pterosaur specimens with specimens incorporated into analyses indicated.
Legend
Specimens used for analyses
Measurments taken from images using ImageJ
Estimated based on next largest specimen
Specimens added to additional analyses including larger and smaller indviduals
	Specimen number	Morphotype	Grouping	skull length	Mandible length	Mandible depth	Humerus	Radius/ulna	Wing metacarpal	Wing phalanx 1	Wing phalanx 2	Wing phalanx 3	Wing phalanx 4	Femur	Tibia	Metatarsal (longest)	Notes	Source
Aetodactylus_halli	SMU 76838	Pterodactyloid	Ornithocheridae?	NA	384		NA	NA	NA	NA	NA	NA	NA	NA	NA	NA		Myers 2010 A new ornithocherid pterosaur from the Upper Cretaceous (Cenomanian-Turonian) Eagle Ford Group of Texas. Journal of Vertebrate Paleontology 30: 280-287.
Anhanguera_piscator	NSM PV 19892	Pterodactyloid	Anhangueridae	617	533	47	255	390	256	NA	>350	>218	>157	234	280		Scapula-coracoid, and extensor process of D4P1 unfused	Kellner & Tomida 2000. Description of a new species of Anhangueridae (Pterodactyloidea) with comments on the pterosaur fauna from the Santana Formation (Aptian-Albian), northeastern Brazil. National Science Museum Monograph 17:1-135
Anhanguera_spielbergi	RGM 401 880	Pterodactyloid	Anhangueridae	712	606		290	410	NA	NA	NA	NA	NA	285	355			Veldmeijer. 2003. Coloborhynchus spielbergi sp. nov. (Pterodactyloidea) from the Albian (Lower Cretaceous) of Brazil. Scripta Geologica 125:35-139
Anurognathus_ammoni	SMNS 81928a/b	Basal	Anurognathidae	NA	NA	NA	18.2	25.5	5	29.1	22.5	12.7	-	14.5	20.2	8.5	Unfused skull, scuaplo-coracoid, carpals, sacrum, tarsals	Bennett 2007 A second specimen of Anurognantus ammoni. Pälaontologische Zeitschrift 81: 376-398
Anurognathus_ammoni	BSP 1922 I 42	Basal	Anurognathidae				32	46	11	58	NA	NA	NA	27	39	18		Bennett 2007 A second specimen of Anurognantus ammoni. Pälaontologische Zeitschrift 81: 376-398
Aralazhdarco_bostobensis	ZIN PH, no. 9/43	Pterodactyloid	Azhdarcidae	NA	NA	NA	NA	NA	NA	NA	NA	NA	NA	NA	NA	NA		Averianov 2007 New Records of Azhdarchids (Pterosauria, Azhdarchidae) from the Late Cretaceous of Russia, Kazakhstan, and Central Asia. Paleontological Journal 41:189–197.
Archaeoistiodactylus_linglongtaensis	JPM04 0006	Pterodactyloid	Istiodactylidae	NA	NA	NA	47	70	28	>35	63	63	51	44	62			Lü and Fucha 2010 A new pterosaur (Pterosauria) from Middle Jurassic Tioajishan Formation of western Liaoning, China. Global Geology 13: 113-118
Ardeadactylys_longicollum	HM	Pterodactyloid	Euctenochasmatia	NA	NA	NA	NA	NA	NA	NA	NA	NA	NA	97	NA			Wellnhofer 1970. Die Pterodactyloidea (Pterosauria) der Oberjura- Plattenkalke Suddeutschlands. Bayerische Akademie der Wissenschaften, Mathematisch-Wissenschaftlichen Klasse, Abhandlungen 141: 1–133.
Ardeadactylys_longicollum	PTH	Pterodactyloid	Euctenochasmatia	~200	NA	NA	NA	NA	150	NA	NA	NA	NA	111	NA			Wellnhofer 1970. Die Pterodactyloidea (Pterosauria) der Oberjura- Plattenkalke Suddeutschlands. Bayerische Akademie der Wissenschaften, Mathematisch-Wissenschaftlichen Klasse, Abhandlungen 141: 1–133.
Ardeadactylys_longicollum	SMS	Pterodactyloid	Euctenochasmatia	215	180		78	104	130	160	109	77.5	65	99	149	30		Wellnhofer 1970. Die Pterodactyloidea (Pterosauria) der Oberjura- Plattenkalke Suddeutschlands. Bayerische Akademie der Wissenschaften, Mathematisch-Wissenschaftlichen Klasse, Abhandlungen 141: 1–133. Bennett 2013. New information on body size and cranial display structures of Pterodactylus antiquus, with a revision of the genus. Palaontol Z 87:269-289
Arthurdactylus_conandoylei	SMK PAL 1132	Pterodactyloid	Ornithocheridae	NA	NA	NA	230	312	227	445	402	312	275	190	234	60		Unwin et al. 2000 On the systematic and stratigraphic significance of pterosaurs from the Lower Cretaceous Yixian Formation (Jehol Group) of Liaoning, China. Mitt. Mus. Nat.kd. Berl., Geoziss. Reihe 3:181-206
Auroazhdarcho_micronyx	BSt (Ex. 29, Wellnhofer 1970)	Pterodactyloid	Ctenochasmatidae	26	16		NA	19	17	23.2	20	15	NA	15	18		Juvenile	Wellnhofer 1970. Die Pterodactyloidea (Pterosauria) der Oberjura- Plattenkalke Suddeutschlands. Bayerische Akademie der Wissenschaften, Mathematisch-Wissenschaftlichen Klasse, Abhandlungen 141: 1–133.
Auroazhdarcho_micronyx	BSP 1936 I 50	Pterodactyloid	Ctenochasmatidae	25.5	19		15	18.8	16.1	21.8	16	13.7	13.9	14	17.6		Juvenile	Wellnhofer 1970. Die Pterodactyloidea (Pterosauria) der Oberjura- Plattenkalke Suddeutschlands. Bayerische Akademie der Wissenschaften, Mathematisch-Wissenschaftlichen Klasse, Abhandlungen 141: 1–133.
Aurorazhdarcho_micronyx	PTH 1957.52	Pterodactyloid	Ctenochasmatidae	26.5	18.5	2.32	14.5	17.5	14	17.7	16.4	15.5	14.5	12.2	16.5	5.8	Juvenile	Wellnhofer 1970. Die Pterodactyloidea (Pterosauria) der Oberjura- Plattenkalke Suddeutschlands. Bayerische Akademie der Wissenschaften, Mathematisch-Wissenschaftlichen Klasse, Abhandlungen 141: 1–133. Bennett 2006 Juvenile specimens of the pterosaur Germanodactylus cristatus, with a review of the genus. Journal of Vertebrate Paleontology 26:872-878
Auroazhdarcho_micronyx	BSP 1964 XXIII 100	Pterodactyloid	Ctenochasmatidae	27.5	19.5		16.5	20.5	17.5	22.5	19	15	15.7	15	19.2		Juvenile	Wellnhofer 1970. Die Pterodactyloidea (Pterosauria) der Oberjura- Plattenkalke Suddeutschlands. Bayerische Akademie der Wissenschaften, Mathematisch-Wissenschaftlichen Klasse, Abhandlungen 141: 1–133.
Aurorazhdarcho_micronyx	UB E552	Pterodactyloid	Ctenochasmatidae	28	22.7		16.9	21.8	19.2	24.3	21.5	16.9	16.6	16.8	19.5		Juvenile	Wellnhofer 1970. Die Pterodactyloidea (Pterosauria) der Oberjura- Plattenkalke Suddeutschlands. Bayerische Akademie der Wissenschaften, Mathematisch-Wissenschaftlichen Klasse, Abhandlungen 141: 1–133.
Aurorazhdarcho_micronyx	TM 13104	Pterodactyloid	Ctenochasmatidae	32.5	23.5		18.5	25	19.8	28.5	24	19.8	18.4	18.4	23.5		Juvenile	Wellnhofer 1970. Die Pterodactyloidea (Pterosauria) der Oberjura- Plattenkalke Suddeutschlands. Bayerische Akademie der Wissenschaften, Mathematisch-Wissenschaftlichen Klasse, Abhandlungen 141: 1–133.
Aurorazhdarcho_micronyx	RM ST 18183	Pterodactyloid	Ctenochasmatidae	36	24		18.8	23	21	27	23	18	15	15	22		Juvenile	Wellnhofer 1970. Die Pterodactyloidea (Pterosauria) der Oberjura- Plattenkalke Suddeutschlands. Bayerische Akademie der Wissenschaften, Mathematisch-Wissenschaftlichen Klasse, Abhandlungen 141: 1–133.
Aurorazhdarcho_micronyx	CM 11425	Pterodactyloid	Ctenochasmatidae	41.5	33		18	25	24	32	25	22	19	20	26.5		Juvenile	Wellnhofer 1970. Die Pterodactyloidea (Pterosauria) der Oberjura- Plattenkalke Suddeutschlands. Bayerische Akademie der Wissenschaften, Mathematisch-Wissenschaftlichen Klasse, Abhandlungen 141: 1–133.
Auroazhdarcho_micronyx	SM R405	Pterodactyloid	Ctenochasmatidae	46	38		18.5	24.5	21	27.5	25	20	17	16	23.5		?adult	Wellnhofer 1970. Die Pterodactyloidea (Pterosauria) der Oberjura- Plattenkalke Suddeutschlands. Bayerische Akademie der Wissenschaften, Mathematisch-Wissenschaftlichen Klasse, Abhandlungen 141: 1–133.
Auroazhdarcho_micronyx	BM 42735	Pterodactyloid	Ctenochasmatidae	46.5	39		19	23.5	23	28	25	19.5	18	16	24.5		?adult	Wellnhofer 1970. Die Pterodactyloidea (Pterosauria) der Oberjura- Plattenkalke Suddeutschlands. Bayerische Akademie der Wissenschaften, Mathematisch-Wissenschaftlichen Klasse, Abhandlungen 141: 1–133.
Auroazhdarcho_micronyx	ELTE V256	Pterodactyloid	Ctenochasmatidae	NA	NA	NA	20.5	26	26	34	28	22	18	22	29		?juvenile	Wellnhofer 1970. Die Pterodactyloidea (Pterosauria) der Oberjura- Plattenkalke Suddeutschlands. Bayerische Akademie der Wissenschaften, Mathematisch-Wissenschaftlichen Klasse, Abhandlungen 141: 1–133.
Auroazhdarcho_micronyx	MB R 3581	Pterodactyloid	Ctenochasmatidae	NA	NA	NA	23	30.5	30.5	41	32	24	18	26	34		?juvenile	Wellnhofer 1970. Die Pterodactyloidea (Pterosauria) der Oberjura- Plattenkalke Suddeutschlands. Bayerische Akademie der Wissenschaften, Mathematisch-Wissenschaftlichen Klasse, Abhandlungen 141: 1–133.
Auroazhdarcho_micronyx	SNSD MMG BaJ 21	Pterodactyloid	Ctenochasmatidae	51	40		23	30	31	38	31	23.5	21	24	33		?juvenile	Wellnhofer 1970. Die Pterodactyloidea (Pterosauria) der Oberjura- Plattenkalke Suddeutschlands. Bayerische Akademie der Wissenschaften, Mathematisch-Wissenschaftlichen Klasse, Abhandlungen 141: 1–133.
Auroazhdarcho_micronyx	BSP 1911 I 31	Pterodactyloid	Ctenochasmatidae	57	47		25	31	40	46	28.5	19.5	17.7	29	40.5	8.7		Wellnhofer 1970. Die Pterodactyloidea (Pterosauria) der Oberjura- Plattenkalke Suddeutschlands. Bayerische Akademie der Wissenschaften, Mathematisch-Wissenschaftlichen Klasse, Abhandlungen 141: 1–133.
Auroazhdarcho_micronyx	PMU 24792	Pterodactyloid	Ctenochasmatidae	67	56.5		26	35	38	48	35.5	26	23	30	44			Wellnhofer 1970. Die Pterodactyloidea (Pterosauria) der Oberjura- Plattenkalke Suddeutschlands. Bayerische Akademie der Wissenschaften, Mathematisch-Wissenschaftlichen Klasse, Abhandlungen 141: 1–133.
Auroazhdarcho_micronyx	CM 11426	Pterodactyloid	Ctenochasmatidae	70.5	63	2.515	28.1	39.6	46.8	55.6	38.2	22.9	19.9	33.4	51.1	11.9	Juvenile	Hone et al. 2013. An annotated and illustrated catalogue of Solnhofen (Upper Jurassic, Germany) pterosaur specimens at Carnegie Museum of Natural History. Annals of Carnegie Museum 82(2) 165–191.
Auroazhdarcho_primordius	NMB Sh 110	Pterodactyloid	Ctenochasmatidae	NA	NA	NA	62.4	82.9	94.6	119	70.8	50.6	50.5	79	116	22.6	Subadult (fusion of scapula-coracoid partial)	Frey et al. 2011. The oldest azhdarchoid pterosaur from the Late Jurassic Solnhofen Limestone (Early Tithonian) of Southern Germany. Swiss Journal of Geosciences 104 (Suppl) 1): S35-S55
Austriadactylus_cristatus	SMNS 56342	Basal	Preondactylia	110	NA	NA	NA	96.5	NA	NA	101	103.5	NA	NA	NA	NA		Dalla Vecchia et al 2002. A crested rhamphorhynchoid pterosaur from the Late Triassic of Austria. Journal of Vertebrate Paleontology 22:196-199
Austriadactylus_cristatus	SC 332466	Basal	Preondactylia	72			36	50	15.7	40	NA	NA	NA	NA	NA	NA		Dalla Veccia 2003 New morphological observations on Triassic pterosaurs. From: Buffetaut & Mazin (eds) 2003 Evolution and Palaeobiology of Pterosaurs. Geological Society, London, Special Publications 217:23-48
Bakonydraco_galaczi	MTMGyn/3	Pterodactyloid	Azhdarcidae	NA			NA	NA	NA	NA	NA	NA	NA	NA	NA	NA		Ősi, A. et al.2005. First evidence of azhdarchid pterosaurs from the Late Cretaceous of Hungary. Acta Palaeontologica Polonica 50 (4): 777–787.
Barbosania_gracilirostris	MHNS/00/85	Pterodactyloid	Ornithocheridae?	391	330		155	223	155	>191.9	NA	NA	NA	127	NA	NA		Elgin & Frey 2011. A new ornithocheirid, Barbosania gracilirostris gen. et sp. nov. (Pterosauria, Pterodactyloidea) from the Santana Formation (Cretaceous) of NE Brazil. Swiss Journal of Palaeontology 130:259–275
Batrachognathus_volans	PIN 52-2	Basal	Anurognathidae		48									24	42			Wellnhofer 1978. Pterosaurier. Springer Verlag, Stuttgart
Beipiaopterus_chenianus	BPM 0002	Pterodactyloid	Ctenochasmatidae	NA	NA	NA	68	75	75	183	85	77	-	42	102	40	Scapula and coracoid unfused, sacral vertebrae fused	Lu 2003 A new pterosaur: Beipiaopterus chenianus, gen. et sp. nov. (Reptilia:Pterosauria) from Western Liaoning Province of China. Memoir of the Fukui Prefectoral Dinosaur Museum 2: 153-160
Boreopterus_cuiae	JZMP 04 07 3	Pterodactyloid	Boreopterinae	235	200	14.26	79	112	94	137	123	98	87	82	82	14	Scapula and coracoid not fused, partial fusion of cranial bones	Lu and Ji 2005 A new ornithocherid from the early Cretaceous of Liaoning Province, China. Acta Geologica Sinica 79: 157-163
Boreopterus_giganticus	IVPP V14585	Pterodactyloid	Boreopterinae	477.5	418.5		NA	NA	NA	NA	NA	NA	NA	NA	NA	NA	Skull elements fused	Jiang et al. 2014. A new boreopterid pterosaur from the Lower Cretaceous of western Liaoning, China, with a reassessment of the phylogenetic relationships of the Boreopteridae. Journal of Paleontology 88:823-828
Bellubrunnus_rothgaengeri	BSP 1993 XVIII 2	Basal	Rhamphorhynchidae	23		NA	14	22	9	27	23	21	23	10	12	6	Juvenile. Lack of fusion of; skull, scapula-coracoid, sacrals, tarsals. Also proportions of the skull (relatively v.large eyes) and poor ossification of some bones	Hone et al. 2012 A new non-pterodactyloid pterosaur from the Late Jurassic of Southern Germany. PLoS One 7: e39312. doi:10.1371/journal.pone.0039312
Cacibupteryx_caribensis	IGO V 208	Basal	Rhamphorhynchidae	>154	NA	NA	NA	NA	NA	NA	NA	NA	NA	NA	NA	NA		Gasparini et al. 2004 A new pterosaur from the Jurassic of Cuba. Palaeontology 47: 919-927
Caiuajara_dobruskii	CP.V 866a	Pterodactyloid	Tapejaridae				38.8	49.5	NA	NA	NA	NA	NA	NA	NA	NA		Manzig et al. 2014 Discovery of a rare pterosaur bone bed in a Cretaceous desert with insights on ontogeny and behaviour of flying reptiles. PLoS One 9: e100005. doi:10.1371/journal.pone.0100005
Caiuajara_dobruskii	CP. V 869	Pterodactyloid	Tapejaridae				39	50.4	NA	NA	NA	NA	NA	72.4	NA	NA		Manzig et al. 2014 Discovery of a rare pterosaur bone bed in a Cretaceous desert with insights on ontogeny and behaviour of flying reptiles. PLoS One 9: e100005. doi:10.1371/journal.pone.0100006
Caiuajara_dobruskii	CP. V 872a	Pterodactyloid	Tapejaridae				83.9	109.8	NA	NA	121.4	NA	NA	84.1	103	NA		Manzig et al. 2014 Discovery of a rare pterosaur bone bed in a Cretaceous desert with insights on ontogeny and behaviour of flying reptiles. PLoS One 9: e100005. doi:10.1371/journal.pone.0100007
Caiuajara_dobruskii	CP. V1001a	Pterodactyloid	Tapejaridae				91.3	NA	124.5	NA	NA	NA	NA	NA	NA	NA		Manzig et al. 2014 Discovery of a rare pterosaur bone bed in a Cretaceous desert with insights on ontogeny and behaviour of flying reptiles. PLoS One 9: e100005. doi:10.1371/journal.pone.0100008
Caiuajara_dobruskii	CP. V1001b	Pterodactyloid	Tapejaridae				79.2	113.7	110.3	NA	NA	104.5	NA	NA	NA	NA		Manzig et al. 2014 Discovery of a rare pterosaur bone bed in a Cretaceous desert with insights on ontogeny and behaviour of flying reptiles. PLoS One 9: e100005. doi:10.1371/journal.pone.0100009
Caiuajara_dobruskii	CP. V1002	Pterodactyloid	Tapejaridae				77	99.3		NA	NA	NA	NA	NA	95	NA		Manzig et al. 2014 Discovery of a rare pterosaur bone bed in a Cretaceous desert with insights on ontogeny and behaviour of flying reptiles. PLoS One 9: e100005. doi:10.1371/journal.pone.0100010
Caiuajara_dobruskii	CP. V1006	Pterodactyloid	Tapejaridae				90.6	NA	NA	170	166.6	162.4	49.4	NA	NA	NA		Manzig et al. 2014 Discovery of a rare pterosaur bone bed in a Cretaceous desert with insights on ontogeny and behaviour of flying reptiles. PLoS One 9: e100005. doi:10.1371/journal.pone.0100011
Caiuajara_dobruskii	CP. V1007	Pterodactyloid	Tapejaridae				65.3	90	NA	NA	NA	NA	NA	74.5	NA	NA		Manzig et al. 2014 Discovery of a rare pterosaur bone bed in a Cretaceous desert with insights on ontogeny and behaviour of flying reptiles. PLoS One 9: e100005. doi:10.1371/journal.pone.0100012
Caiuajara_dobruskii	CP. V1009	Pterodactyloid	Tapejaridae				72.9	NA	129.4	NA	NA	NA	NA	NA	NA	NA		Manzig et al. 2014 Discovery of a rare pterosaur bone bed in a Cretaceous desert with insights on ontogeny and behaviour of flying reptiles. PLoS One 9: e100005. doi:10.1371/journal.pone.0100013
Caiuajara_dobruskii	CP. V1010	Pterodactyloid	Tapejaridae				72.4	NA	NA	NA	NA	NA	NA	NA	NA	NA		Manzig et al. 2014 Discovery of a rare pterosaur bone bed in a Cretaceous desert with insights on ontogeny and behaviour of flying reptiles. PLoS One 9: e100005. doi:10.1371/journal.pone.0100014
Caiuajara_dobruskii	CP. V1013	Pterodactyloid	Tapejaridae				113.6	NA	NA	NA	NA	NA	NA	NA	NA	NA		Manzig et al. 2014 Discovery of a rare pterosaur bone bed in a Cretaceous desert with insights on ontogeny and behaviour of flying reptiles. PLoS One 9: e100005. doi:10.1371/journal.pone.0100015
Caiuajara_dobruskii	CP. V1014	Pterodactyloid	Tapejaridae				115.4	NA	NA	NA	NA	NA	NA	NA	NA	NA		Manzig et al. 2014 Discovery of a rare pterosaur bone bed in a Cretaceous desert with insights on ontogeny and behaviour of flying reptiles. PLoS One 9: e100005. doi:10.1371/journal.pone.0100016
Caiuajara_dobruskii	CP. V1015	Pterodactyloid	Tapejaridae				115.6	NA	NA	NA	NA	NA	NA	NA	NA	NA		Manzig et al. 2014 Discovery of a rare pterosaur bone bed in a Cretaceous desert with insights on ontogeny and behaviour of flying reptiles. PLoS One 9: e100005. doi:10.1371/journal.pone.0100017
Caiuajara_dobruskii	CP. V1023	Pterodactyloid	Tapejaridae				NA	NA	NA	165	137.7	NA	NA	69.3	NA	NA		Manzig et al. 2014 Discovery of a rare pterosaur bone bed in a Cretaceous desert with insights on ontogeny and behaviour of flying reptiles. PLoS One 9: e100005. doi:10.1371/journal.pone.0100018
Caiuajara_dobruskii	CP. V1024	Pterodactyloid	Tapejaridae				74.1		NA	NA	NA	NA	NA	NA	NA	56.5		Manzig et al. 2014 Discovery of a rare pterosaur bone bed in a Cretaceous desert with insights on ontogeny and behaviour of flying reptiles. PLoS One 9: e100005. doi:10.1371/journal.pone.0100019
Caiuajara_dobruskii	Cp. V1025	Pterodactyloid	Tapejaridae				NA	NA	NA	NA	NA	NA	NA	118.6	NA	NA		Manzig et al. 2014 Discovery of a rare pterosaur bone bed in a Cretaceous desert with insights on ontogeny and behaviour of flying reptiles. PLoS One 9: e100005. doi:10.1371/journal.pone.0100020
Caiuajara_dobruskii	CP. V2029	Pterodactyloid	Tapejaridae				NA	NA	NA	NA	NA	NA	NA	114	NA	NA		Manzig et al. 2014 Discovery of a rare pterosaur bone bed in a Cretaceous desert with insights on ontogeny and behaviour of flying reptiles. PLoS One 9: e100005. doi:10.1371/journal.pone.0100021
Campylognathoides_zitteli	SMNS 9787	Basal	Novialoidea	114	108.25	9.09	78.3239	83	30	195	210	165	122	70	>92	41		Padian 2008. The Early Jurassic pterosaur Campylognathoides Strand, 1928. Special Papers in Palaeontology 80: 69-107
Campylognathoides_zitteli	SMNS 51100	Basal	Novialoidea	85	90	NA	67	71	28	196	199	155	115	NA	NA	67		Padian 2008. The Early Jurassic pterosaur Campylognathoides Strand, 1928. Special Papers in Palaeontology 80: 69-107
Campylognathoides_liassicus	GPIT 9533	Basal	Novialoidea	NA	NA		42	52	19	83	>80	NA	>56	NA	NA	NA		Padian 2008. The Early Jurassic pterosaur Campylognathoides Strand, 1928. Special Papers in Palaeontology 80: 69-107
Campylognathoides_liassicus	MNHN HLZ 50	Basal	Novialoidea	85	70	5.37	50	64	23	92	99	86	68	38	47	20		Padian 2008. The Early Jurassic pterosaur Campylognathoides Strand, 1928. Special Papers in Palaeontology 80: 69-107
Campylognathoides_liassicus	UUPM R157	Basal	Novialoidea	NA	66		55	64	23	97	102	>81	NA	40	53	22		Padian 2008. The Early Jurassic pterosaur Campylognathoides Strand, 1928. Special Papers in Palaeontology 80: 69-107
Campylognathoides_liassicus	CM 11424	Basal	Novialoidea	83	66		50	60	23	83	81	73	63	38	47	22		Padian 2008. The Early Jurassic pterosaur Campylognathoides Strand, 1928. Special Papers in Palaeontology 80: 69-107
Campylognathoides_liassicus	SMNS 18879	Basal	Novialoidea	68	59	3.61	45	53	23	83	81	73	63	32	34	NA		Padian 2008. The Early Jurassic pterosaur Campylognathoides Strand, 1928. Special Papers in Palaeontology 80: 69-107
Campylognathoides_liassicus	SMNS 50735	Basal	Novialoidea	NA	63		53	66	22	100	108	95	70	43	53	22		Padian 2008. The Early Jurassic pterosaur Campylognathoides Strand, 1928. Special Papers in Palaeontology 80: 69-107
Campylognathoides_liassicus	SMNS 50807	Basal	Novialoidea	80	NA	NA	NA	NA	NA	NA	NA	NA	NA	NA	NA	NA		Padian 2008. The Early Jurassic pterosaur Campylognathoides Strand, 1928. Special Papers in Palaeontology 80: 69-108
Campylognathoides_liassicus	SMNS 54049	Basal	Novialoidea	NA	NA		44	55	20	86	NA	NA	NA	32	36	NA		Padian 2008. The Early Jurassic pterosaur Campylognathoides Strand, 1928. Special Papers in Palaeontology 80: 69-107
Caupedactylus_ybaka	MN 4726-V	Pterodactyloid	Tapejaridae	NA	NA	NA	175	NA	NA	NA	NA	NA	NA	NA	NA	NA		Kellner 2012. A new unusual tapejarid (Pterosauria, Pterodactyloidea) from the Early Cretaceous Romualdo Formation, Araripe Basin, Brazil. Earth and Environmental Science Transactions of the Royal Society of Edinburgh 103: 409–421
Cearadactylus_atrox	F-PV-93	Pterodactyloid	Anhangueria	536	482		NA	NA	NA	NA	NA	NA	NA	NA	NA	NA		Unwin 2002 On the systematic relationships of Cearadacty Zus atrox, an enigmatic Early Cretaceous pterosaur from the Santana Formation of Brazil. Mitt. Mus. Nat.kd. Berl., Geowiss. Reihe 5: 239-263
Cearadactylus_atrox	MN7019-V	Pterodactyloid	Anhangueria	515			NA	NA	NA	NA	NA	NA	NA	NA	NA	NA		Vila Nova et al. 2014 Redescription of Cearadactylus atrox (Pterosauria, Pterodactyloidea) from the Early Cretaceous Romualdo Formation (Santana Group) of the Araripe Basin, Brazil, Journal of Vertebrate Paleontology, 34:1, 126-134
Changchengopterus_pani	CYGB 0036	Basal	Pterodactyliformes	NA	NA	NA	25.9	36.8	15.6	30	32	30	NA	21	25	NA	Juvenile; unfused scapula and coracoid, and extensor tendon process of wing phalanx 1	Lü 2006 A new non-pterodactyloid pterosaur from Qinglong County, Hebei Province, China. Acta Geologica Sinica 83: 189-199
Changchengopterus_pani	PMOL AP 00010	Basal	Pterodactyliformes	NA	NA	NA	50.2	76	27	60	61	60	NA	43	53.3	18.3		Zhou & Schoch 2011 New material of the non-pterodactyloid pterosaur Changchengopterus pani LÜ, 2009 from the Late Jurassic Tiaojishan Formation of western Liaoning. N. Jb. Geol. Paläont. Abh. 260: 265–275
Chaoyangopterus_zhangi	IVPP V13397	Pterodactyloid	Chaoyanopteridae	270			93	133	185	200	120	78	48	133	208	52	Scapula and coracoid "incompletely fused"	Wang and Zhou 2003 Two new pterodactyloid pterosaurs from the Early Cretaceous Jiufotang Formation of Western Liaoning, China. Vertebrata Palasiatica 41: 34-41
Chaoyangopterus_zhangi	LPM R00076	Pterodactyloid	Chaoyanopteridae		190		78	111.3	149.4	164	112	71	NA	107.7	156	NA	Juvenile based on unfused scapula and coracoid, and extensor tendon process of wing phalanx 1	Zhou 2010 New material of Chaoyangopterus (Pterosauria: Pterodactyloidea) from the Early Cretaceous Jiufotang Formation of western Liaoning, China. N. Jb. Geol. Paläont. Abh. 257: 341-350
Comodactylus_ostromi	YPM 9150	Basal	?	NA	NA	NA	NA	NA	57.5	NA	NA	NA	NA	NA	NA	NA		Galton. 1981. A rhamphorhynchoid pterosaur from the Upper Jurassic of North America. Journal of Paleontology 55:1117-1122
Ctenochasma_elegans	BSP 1875.XIV.501	Pterodactyloid	Ctenochasmatidae	33	25	NA	15	20	16.5	21.3	19.5	15.5	13.8	12.5	17.5	5.6		Bennett 2007. A review of the pterosaur Ctenochasma: taxonomy and ontogeny. N. Jb. Geol. Paläont. Abh. 267: 23–41 & Wellnhofer 1970. Die Pterodactyloidea (Pterosauria) der Oberjura- Plattenkalke Suddeutschlands. Bayerische Akademie der Wissenschaften, Mathematisch-Wissenschaftlichen Klasse, Abhandlungen 141: 1–133.
Ctenochasma_elegans	BSP 1867.II.I	Pterodactyloid	Ctenochasmatidae	33.5	25.5		15	18.2	16.5	19.5	17.8	14.3	12.8	12.3	17.6	5.6		Bennett 2007. A review of the pterosaur Ctenochasma: taxonomy and ontogeny. N. Jb. Geol. Paläont. Abh. 267: 23–41 & Wellnhofer 1970. Die Pterodactyloidea (Pterosauria) der Oberjura- Plattenkalke Suddeutschlands. Bayerische Akademie der Wissenschaften, Mathematisch-Wissenschaftlichen Klasse, Abhandlungen 141: 1–133.
Ctenochasma_elegans	Welln. Ex. 47	Pterodactyloid	Ctenochasmatidae	34	NA		14.5	20	16	22	19.5	16	15	14	19			Bennett 2007. A review of the pterosaur Ctenochasma: taxonomy and ontogeny. N. Jb. Geol. Paläont. Abh. 267: 23–41 & Wellnhofer 1970. Die Pterodactyloidea (Pterosauria) der Oberjura- Plattenkalke Suddeutschlands. Bayerische Akademie der Wissenschaften, Mathematisch-Wissenschaftlichen Klasse, Abhandlungen 141: 1–133. Unwin et al.2000. On the systematic and stratigraphic significance of pterosaurs f…
Ctenochasma_elegans	PMZ A/III 100	Pterodactyloid	Ctenochasmatidae	39	29.5		17	22	18.5	24	21.5	17.3	15.5	15	20.2			Bennett 2007. A review of the pterosaur Ctenochasma: taxonomy and ontogeny. N. Jb. Geol. Paläont. Abh. 267: 23–41 & Wellnhofer 1970. Die Pterodactyloidea (Pterosauria) der Oberjura- Plattenkalke Suddeutschlands. Bayerische Akademie der Wissenschaften, Mathematisch-Wissenschaftlichen Klasse, Abhandlungen 141: 1–133.
Ctenochasma_elegans	MBU (Welln. Ex. 49)	Pterodactyloid	Ctenochasmatidae	42	36		16.9	21.5	18.4	24.5	22	17.3	15.5	15.5	21			Bennett 2007. A review of the pterosaur Ctenochasma: taxonomy and ontogeny. N. Jb. Geol. Paläont. Abh. 267: 23–41 & Wellnhofer 1970. Die Pterodactyloidea (Pterosauria) der Oberjura- Plattenkalke Suddeutschlands. Bayerische Akademie der Wissenschaften, Mathematisch-Wissenschaftlichen Klasse, Abhandlungen 141: 1–133.
Ctenochasma_elegans	SoS 4007	Pterodactyloid	Ctenochasmatidae	42.5	33.5		19.2	22	21	26.5	24.1	18.4	17.1	15.5	21.5			Bennett 2007. A review of the pterosaur Ctenochasma: taxonomy and ontogeny. N. Jb. Geol. Paläont. Abh. 267: 23–41 & Wellnhofer 1970. Die Pterodactyloidea (Pterosauria) der Oberjura- Plattenkalke Suddeutschlands. Bayerische Akademie der Wissenschaften, Mathematisch-Wissenschaftlichen Klasse, Abhandlungen 141: 1–133.
Ctenochasma_elegans	MBH (Welln. Ex. 51)	Pterodactyloid	Ctenochasmatidae	43.5	35		19.5	23.5	21	27	23.5	18.5	16	15.8	22.5			Bennett 2007. A review of the pterosaur Ctenochasma: taxonomy and ontogeny. N. Jb. Geol. Paläont. Abh. 267: 23–41 & Wellnhofer 1970. Die Pterodactyloidea (Pterosauria) der Oberjura- Plattenkalke Suddeutschlands. Bayerische Akademie der Wissenschaften, Mathematisch-Wissenschaftlichen Klasse, Abhandlungen 141: 1–133.
Ctenochasma_elegans	GIE (Welln. Ex. 52)	Pterodactyloid	Ctenochasmatidae	55	45		24	29	26	32.5	28.5	21.5	18	18.96	27			Bennett 2007. A review of the pterosaur Ctenochasma: taxonomy and ontogeny. N. Jb. Geol. Paläont. Abh. 267: 23–41 & Wellnhofer 1970. Die Pterodactyloidea (Pterosauria) der Oberjura- Plattenkalke Suddeutschlands. Bayerische Akademie der Wissenschaften, Mathematisch-Wissenschaftlichen Klasse, Abhandlungen 141: 1–133.
Ctenochasma_elegans	BSP 1935.I.24	Pterodactyloid	Ctenochasmatidae	104	90.48		38.5	52.5	52	66	57	NA	NA	35	55			Bennett 2007. A review of the pterosaur Ctenochasma: taxonomy and ontogeny. N. Jb. Geol. Paläont. Abh. 267: 23–41 & Wellnhofer 1970. Die Pterodactyloidea (Pterosauria) der Oberjura- Plattenkalke Suddeutschlands. Bayerische Akademie der Wissenschaften, Mathematisch-Wissenschaftlichen Klasse, Abhandlungen 141: 1–133.
Ctenochasma_elegans	Schöpfl specimen	Pterodactyloid	Ctenochasmatidae	121			47	65	62	NA	NA	NA	NA	44	67			Bennett 2007. A review of the pterosaur Ctenochasma: taxonomy and ontogeny. N. Jb. Geol. Paläont. Abh. 267: 23–41 & Wellnhofer 1970. Die Pterodactyloidea (Pterosauria) der Oberjura- Plattenkalke Suddeutschlands. Bayerische Akademie der Wissenschaften, Mathematisch-Wissenschaftlichen Klasse, Abhandlungen 141: 1–133.
Ctenochasma_elegans	BSP 1920.I.57	Pterodactyloid	Ctenochasmatidae	145			NA	NA	NA	NA	NA	NA	NA	NA	NA	NA		Bennett 2007. A review of the pterosaur Ctenochasma: taxonomy and ontogeny. N. Jb. Geol. Paläont. Abh. 267: 23–41 & Wellnhofer 1970. Die Pterodactyloidea (Pterosauria) der Oberjura- Plattenkalke Suddeutschlands. Bayerische Akademie der Wissenschaften, Mathematisch-Wissenschaftlichen Klasse, Abhandlungen 141: 1–133.
Ctenochasma_elegans	SMNS 81803	Pterodactyloid	Ctenochasmatidae	199	173.13		NA	NA	NA	NA	NA	NA	NA	NA	NA	NA	Lack of fusion of skull elements indicates still immature. Similar skull proportions in animals with skulls of >100mm length, suggesting adult proportions reached at that size.	Bennett 2007. A review of the pterosaur Ctenochasma: taxonomy and ontogeny. N. Jb. Geol. Paläont. Abh. 267: 23–52
Cycnorhamphus_suevicus	GPIT 80	Pterodactyloid	Ctenochasmatoidea	163	117.7	NA	64.2	88.2	110.7	142	116.7	85	71	77.5	121	29	Juvenile. Scapula and coracoid articulated but unfused, most of the skull elements and extensor process of p1d4 also unfused	Bennett 2012. The morphology and taxonomy of the pterosaur Cycnorhamphus. N. Jb. Geol. Paläont. Abh. 267: 23–41
Cuspiccephalus_scarfi	MJML K1918	Basal	?	326	NA	NA	NA	NA	NA	NA	NA	NA	NA	NA	NA	NA		Martill & Etches 2013 A monofenestratan pterosaur from the Kimmeridge Clay Formation (Kimmeridgian, Upper Jurassic) of Dorset, England. Acta Palaeontologica Polonica 58: 285–294
Daohugoupterus_delicatus	IVPP V12537	Basal	?	NA	NA	NA	41.8	NA	NA	NA	NA	NA	NA	NA	NA	NA		Cheng et al. 2014 Short note on a non-pterodactyloid pterosaur from Upper Jurassic deposits of Inner Mongolia, China. Historical Biology DOI: 10.1080/08912963.2014.974038
Darwinopterus_linglongtaensis	IVPP V16049	Basal	Wukongopteridae	119.2	99.16	5.24	40.4	58	22.5	46.2	50.7	53.2	53.6	39.4	49.8	17	Extensor process of wing phalanx 1 unfused, sacral vertebrae fused, suture visible between scapula and coracoid	Wang et al. 2010 New long-tailed pterosaurs (Wukongopteridae) from western Liaoning, China. Anais da Academia Brasileira de Ciências 82: 1045-1062
Darwinopterus_modularis	ZMNH M8782	Basal	Wukongopteridae	185	157		59	87	36	75	NA	NA	NA	NA	NA	23		Lü et al. 2009 Evidence for modular evolution in a long-tailed pterosaur with a pterodactyloid skull. Proc. R. Soc. B. 277: 383-389
Darwinopterus_modularis	YH-2000	Basal	Wukongopteridae	140	115	5.69	44	64	26	48	55	59	53	40	54	17		Lü et al. 2009 Evidence for modular evolution in a long-tailed pterosaur with a pterodactyloid skull. Proc. R. Soc. B. 277: 383-389
Darwinopterus_robustodens	HGM 41HIII - 309 A	Basal	Wukongopteridae	175	151	7.1	50	80	30	65	75	75	67	43	60	22		Lü et al. 2011 A new darwinopterid pterosaur from the Middle Jurassic of Western Liaoning, Northeastern China and its ecological iplications. Acta Geologica Sinica (English Edition) 85:507-514
Dendrorhynchoides_curvidentatus	GMV2128	Basal	Anurognathidae	NA	NA		27.8	35.5	9.3	44.5	35.6	NA	-	19	26.7	12.1	Vertebral centra unfused	Ji & Ji 1988 A new species of pterosaur from Liaoning, Dendrorhynchus curvidentatus, gen. et sp. nov. Jiangsu Geology 22: 199-206
Dendrorhynchoides_mutoudengensis	JZMP 04 07 3	Basal	Anurognathidae	16	NA	NA	27	42	11	50	41	25	5	21	27	12	Scapula-coracoid, carpals and sacrum unfused	Lü & Hone 2012 A new Chinese anurognathid pterosaur and the evolution of pterosaur tail lengths. Acta Geologica Sinica (English Edition) 86: 1317-1325
Dimorphodon_macronyx	YPM 350	Basal	Dimorphodontia	NA	NA	NA	78	NA	30	NA	97	105	NA	NA	104	32.5		Padian 1983 Osteology and functional morphology of Dimorphodon macronyx (Buckland) (Pterosauria: Rhamphorhynchoidea) based on new material in the Yale Peabody Museum. Potsilla 189: 1-44
Dimorphodon_macronyx	YPM 9180	Basal	Dimorphodontia	NA	NA	NA	NA	NA	36	NA	NA	NA	NA	NA	NA	NA		Padian 1983 Osteology and functional morphology of Dimorphodon macronyx (Buckland) (Pterosauria: Rhamphorhynchoidea) based on new material in the Yale Peabody Museum. Potsilla 189: 1-44
Dimorphodon_macronyx	YPM 9182	Basal	Dimorphodontia	NA	NA	NA	63	NA	NA	NA	74	NA	NA	59	85	22		Padian 1983 Osteology and functional morphology of Dimorphodon macronyx (Buckland) (Pterosauria: Rhamphorhynchoidea) based on new material in the Yale Peabody Museum. Potsilla 189: 1-44
Dimorphodon_macronyx	GSM 1546	Basal	Dimorphodontia				79	102	34	84	93	104.6	38.8	76	105.4			Dalla Vecchia 1997 New observations on the osteology and taxonomic status of Preondactylys buffarinii Wild, 1984 (Reptilia, Pterosauria). Bollettino della Società Paleontologica Italiana 36: 355-366
Dimorphodon_macronyx	BMNH R1034	Basal	Dimorphodontia	-	-	NA	90	114	46	108	124	139	NA	86	126			Dalla Vecchia 1997 New observations on the osteology and taxonomic status of Preondactylys buffarinii Wild, 1984 (Reptilia, Pterosauria). Bollettino della Società Paleontologica Italiana 36: 355-366; Wellnhofer 1978 Pterosauria. Springer Verlag, Stuttgart
Dorygnathus_banthensis	BSP 1938 149	Basal	Rhamphorhynchidae	NA	NA		51	82	25	60	72	74	62	42	59	23		Padian 2008. The Early Jurassic pterosaur Dorygnathus banthensis (Theodori (1830). Special Papers in Palaeontology 80: 1-64.
Dorygnathus_banthensis	MBR 1905.15	Basal	Rhamphorhynchidae	NA	NA		65	105	32	79	93	93	82	53	70	29		Padian 2008. The Early Jurassic pterosaur Dorygnathus banthensis (Theodori (1830). Special Papers in Palaeontology 80: 1-64.
Dorygnathus_banthensis	MBR 1920.16	Basal	Rhamphorhynchidae	160	147	12.46	80	133	38	99	119	119	92	65	92	NA		Padian 2008. The Early Jurassic pterosaur Dorygnathus banthensis (Theodori (1830). Special Papers in Palaeontology 80: 1-64.
Dorygnathus_banthensis	MBR 1977.21	Basal	Rhamphorhynchidae	NA	NA		84	142	42	>110	145	NA	NA	70	88	NA		Padian 2008. The Early Jurassic pterosaur Dorygnathus banthensis (Theodori (1830). Special Papers in Palaeontology 80: 1-64.
Dorygnathus_banthensis	Museum Hauff	Basal	Rhamphorhynchidae	NA	NA		39	60	19	45	52	52	45	30	37	14		Padian 2008. The Early Jurassic pterosaur Dorygnathus banthensis (Theodori (1830). Special Papers in Palaeontology 80: 1-64.
Dorygnathus_banthensis	U Lowen	Basal	Rhamphorhynchidae	NA	NA		60	93	28	72	90	86	66	48	NA	25		Padian 2008. The Early Jurassic pterosaur Dorygnathus banthensis (Theodori (1830). Special Papers in Palaeontology 80: 1-64.
Dorygnathus_banthensis	BMNH R10087	Basal	Rhamphorhynchidae	NA	NA		NA	112	36	90	108	105	NA	57	76	NA		Padian 2008. The Early Jurassic pterosaur Dorygnathus banthensis (Theodori (1830). Special Papers in Palaeontology 80: 1-64.
Dorygnathus_banthensis	GPIT 1645/1	Basal	Rhamphorhynchidae	NA	104		60	101	30	80	92	90	78	49	63	25		Padian 2008. The Early Jurassic pterosaur Dorygnathus banthensis (Theodori (1830). Special Papers in Palaeontology 80: 1-64.
Dorygnathus_banthensis	GPIT1645/2	Basal	Rhamphorhynchidae	NA	NA		NA	85	28	72	82	79	>47	NA	NA	NA		Padian 2008. The Early Jurassic pterosaur Dorygnathus banthensis (Theodori (1830). Special Papers in Palaeontology 80: 1-64.
Dorygnathus_banthensis	GPIT (lost)	Basal	Rhamphorhynchidae	NA	NA		57.5	92	28.5	75	88	NA	NA	48	63	25		Padian 2008. The Early Jurassic pterosaur Dorygnathus banthensis (Theodori (1830). Special Papers in Palaeontology 80: 1-64.
Dorygnathus_banthensis	Swedish Museum	Basal	Rhamphorhynchidae	NA	NA		65	103	34	81	95	96	NA	NA	100	NA		Padian 2008. The Early Jurassic pterosaur Dorygnathus banthensis (Theodori (1830). Special Papers in Palaeontology 80: 1-64.
Dorygnathus_banthensis	UUPM R157	Basal	Rhamphorhynchidae	128	106		61	100	29	73	88	88	71	50	67	25		Padian 2008. The Early Jurassic pterosaur Dorygnathus banthensis (Theodori (1830). Special Papers in Palaeontology 80: 1-64.
Dorygnathus_banthensis	NHMW Vienna	Basal	Rhamphorhynchidae	NA	120		61	101	32	79	102	103	90	50	>65	29		Padian 2008. The Early Jurassic pterosaur Dorygnathus banthensis (Theodori (1830). Special Papers in Palaeontology 80: 1-64.
Dorygnathus_banthensis	U Zurich A/III 493	Basal	Rhamphorhynchidae	NA	NA		61	92	27	75	86	90	74	44	65	21		Padian 2008. The Early Jurassic pterosaur Dorygnathus banthensis (Theodori (1830). Special Papers in Palaeontology 80: 1-64.
Dorygnathus_banthensis	SMNS 18880	Basal	Rhamphorhynchidae	NA	NA		51	68	25	60	70	>51	45	NA	NA	NA		Padian 2008. The Early Jurassic pterosaur Dorygnathus banthensis (Theodori (1830). Special Papers in Palaeontology 80: 1-64.
Dorygnathus_banthensis	SMNS 18969	Basal	Rhamphorhynchidae	NA	96		57	94	29	78	93	80	>50	47	>66	>25		Padian 2008. The Early Jurassic pterosaur Dorygnathus banthensis (Theodori (1830). Special Papers in Palaeontology 80: 1-64.
Dorygnathus_banthensis	SMNS 50164	Basal	Rhamphorhynchidae	120	120	NA	75	105	33	76	97	95	73	55	73	30		Padian 2008. The Early Jurassic pterosaur Dorygnathus banthensis (Theodori (1830). Special Papers in Palaeontology 80: 1-64.
Dorygnathus_banthensis	SMNS 50702	Basal	Rhamphorhynchidae	NA	NA		50	79	26	63	70	68	60	39	50	21	subadult	Padian 2008. The Early Jurassic pterosaur Dorygnathus banthensis (Theodori (1830). Special Papers in Palaeontology 80: 1-64.
Dorygnathus_banthensis	SMNS 50914	Basal	Rhamphorhynchidae	105	NA		61	104	31	80	98	98	84	50	74	30	subadult	Padian 2008. The Early Jurassic pterosaur Dorygnathus banthensis (Theodori (1830). Special Papers in Palaeontology 80: 1-64.
Dorygnathus_banthensis	SMNS 51106	Basal	Rhamphorhynchidae	NA	NA		57	94	28	74	85	84	70	NA	NA	NA	subadult	Padian 2008. The Early Jurassic pterosaur Dorygnathus banthensis (Theodori (1830). Special Papers in Palaeontology 80: 1-64.
Dorygnathus_banthensis	SMNS 51826	Basal	Rhamphorhynchidae	NA	NA		NA	91	29	76	>85	>75	NA	NA	NA	NA		Padian 2008. The Early Jurassic pterosaur Dorygnathus banthensis (Theodori (1830). Special Papers in Palaeontology 80: 1-64.
Dorygnathus_banthensis	SMNS 51827	Basal	Rhamphorhynchidae	95	93	7.69	52	89	28	70	82	82	70	45	58	25	subadult, pelvis and tarsals incompletely fused	Padian 2008. The Early Jurassic pterosaur Dorygnathus banthensis (Theodori (1830). Special Papers in Palaeontology 80: 1-64.
Dorygnathus_banthensis	SMNS 52998	Basal	Rhamphorhynchidae	NA	NA		47	76	NA	NA	61	NA	53	37	49	NA	Juvenile. Scapula-coracoid, sacrum, tibia, tarsals, and illia all unfused	Padian 2008. The Early Jurassic pterosaur Dorygnathus banthensis (Theodori (1830). Special Papers in Palaeontology 80: 1-64.
Dorygnathus_banthensis	SMNS 52999	Basal	Rhamphorhynchidae	NA	NA		51	85	29	72	80	79	66	42	68	24	Subadult, incompletely fused sacrals and tarsals	Padian 2008. The Early Jurassic pterosaur Dorygnathus banthensis (Theodori (1830). Special Papers in Palaeontology 80: 1-64.
Dorygnathus_banthensis	SMNS 55886	Basal	Rhamphorhynchidae	97	90		51	84	27	67	78	76	NA	NA	54.5	22		Padian 2008. The Early Jurassic pterosaur Dorygnathus banthensis (Theodori (1830). Special Papers in Palaeontology 80: 1-64.
Dorygnathus_banthensis	SMNS 56255	Basal	Rhamphorhynchidae	NA	80		56	90	29	71	82	NA	NA	NA	NA	NA		Padian 2008. The Early Jurassic pterosaur Dorygnathus banthensis (Theodori (1830). Special Papers in Palaeontology 80: 1-64.
Dorygnathus_banthensis	SMNS 59293	Basal	Rhamphorhynchidae	NA	NA		79	NA	NA	NA	NA	NA	NA	69	95	35		Padian 2008. The Early Jurassic pterosaur Dorygnathus banthensis (Theodori (1830). Special Papers in Palaeontology 80: 1-64.
Dorygnathus_banthensis	SMNS 59417	Basal	Rhamphorhynchidae	NA	NA		NA	NA	NA	NA	NA	110	70	61	73	27		Padian 2008. The Early Jurassic pterosaur Dorygnathus banthensis (Theodori (1830). Special Papers in Palaeontology 80: 1-64.
Dorygnathus_banthensis	SMNS 80439	Basal	Rhamphorhynchidae	NA	NA		NA	NA	NA	NA	NA	NA	NA	75	95	NA		Padian 2008. The Early Jurassic pterosaur Dorygnathus banthensis (Theodori (1830). Special Papers in Palaeontology 80: 1-64.
Dorygnathus_banthensis	SMNS 81840	Basal	Rhamphorhynchidae	NA	NA		NA	>100	NA	103	NA	NA	NA	NA	NA	NA		Padian 2008. The Early Jurassic pterosaur Dorygnathus bathensis (Theodori (1830). Special Papers in Palaeontology 80: 1-64.
Douzhanopterus_zhengi	STM 19–35A & B	Basal	Monofenestrata	NA	NA	NA	48.49	59.49	31.72	53.26	56.15	53.19	45.54	41.21	69.85	21.58		Wang et al. 2017. New evidence from China for the nature of the pterosaur evolutionary transition. Scientific Reports 7:42763 DOI: 10.1038/srep42763
Dsungaripterus_weii	IVPP V 2776	Pterodactyloid	Dsungariptidae	285	270	36	NA	NA	NA	374	265	202	150	221	NA	NA		Dong 1964. On a new pterosaurian from Sinkiang, China. Vertebrata PalAsiatica 8: 221-255
Elanodactylus_prolatus	NGMC 99 07 01	Pterodactyloid	Ctenochasmatidae	NA	NA	NA	151.3	170.9	126.5	208.9	238.6	212.1	134.7	NA	NA	NA		Andres & Qiang 2008 A new pterosaur from the Liaoning Province of China, the phylogeny of the Pterodactyloidea, and convergence in their cervical vertebrae. Palaeontology 51: 453-469
Eoazdarcho_liaoxiensis	GMN 03 11 002	Pterodactyloid	Chaoyanopteridae	NA	180	NA	90	122	135	178	139	93	50	94	160	NA		Lü & Ji 2005 New azdarchid pterosaur from the Early Cretaceous of Western Liaoning. Acta Geologica Sinica 79: 301-307
Eopteranodon_lii	D2526	Pterodactyloid	Tapejaromorpha	NA	NA	NA	69	96	106	137	103	76	62	80	117	27	Unfused scapula and coracoid, and extensor tendon process of wing phalanx 1	Lü et al. 2006 New material of the pterosaur Eopteranodon from the Early Cretaceous Yixian Formation, western Liaoning, China. Geological Bulletin of China 25: 565-571
Eosipterus_yangi	GMV 2117	Pterodactyloid	Ctenochasmatidae	NA	NA	NA	74.4	95	73	96	95	80	73	60	96	42.5		Ji & Ji 1997 The first discovery of a pterosaur from western Liaoning Province (Eosipterus yangi gen. et sp. nov.) Acta Geologica Sinica 71: 1-6
Eosipterus_yangi	D2541	Pterodactyloid	Ctenochasmatidae	NA	NA	NA	47	60	42	65	62	57	43	35	61	25	Scapula and coracoid not fused	Lü et al. 2006 On the systematic position of Eosipterus yangi Ji et Ji, 1997 among pterodactyloids. Acta Geologica Sinica 80: 643-646
Eudimorphodon_cromptonellus	MGUH VP3393	Basal	Eudimorphodontidae	NA	NA		18.2	20.1	8.4	18	20.5	NA	NA	19.7	20.5	12	Scapula and coracoid not fused	Jenkins et al. 2001. A diminutive pterosaur (Pterosauria: Eudimorphodontidae) from the Greenlandic Triassic. Bulletin Museum of Comparative Zoology 156 :151-170
Eudimorphodon_ranzii	MCSNB 2888	Basal	Eudimorphodontidae	~86	84		47	65	29	80	NA	NA	NA	41	50			Dalla Veccia 2003 New morphological observations on Triassic pterosaurs. From: Buffetaut & Mazin (eds) 2003 Evolution and Palaeobiology of Pterosaurs. Geological Society, London, Special Publications 217:23-44; Wellnhofer 1978. Pterosauria. Gustav Fischer Verlag, Stuttgart.
Eudimorphodon_ranzii	MCSNB 2887	Basal	Eudimorphodontidae				28	38	NA	40	36.5	NA	NA	21.2	28.5			Dalla Veccia 2003 New morphological observations on Triassic pterosaurs. From: Buffetaut & Mazin (eds) 2003 Evolution and Palaeobiology of Pterosaurs. Geological Society, London, Special Publications 217:23-45
Eudimorphodon_ranzii	MCSNB 8950	Basal	Eudimorphodontidae				26	33.5	9	34	35.3	36.2	32	19.6	25.5	8.85	Lack of fusion of skeletal elements	Wild 1994 A juvenile specimen of Eudimorphodon ranzii Zambelli (Reptilia, Pterosauria) from the Upper Triassic (Norian) of Bergamo. Riv Mus Civ Sci Nat “E Caffi”Bergamo 16: 91-115.Dalla Veccia 2003 New morphological observations on Triassic pterosaurs. From: Buffetaut & Mazin (eds) 2003 Evolution and Palaeobiology of Pterosaurs. Geological Society, London, Special Publications 217:23-47
Eudimorphodon_ranzii	BSP 1994 I 51	Basal	Eudimorphodontidae	NA	NA	NA	40	NA	NA	52.9	NA	NA	NA	NA	57.7	NA		Wellnhofer 2003 A Late Triassic pterosaur from the Northern Calcareous Alps (Tyrol, Austria). From: Buffetaut & Mazin (eds) 2003 Evolution and Palaeobiology of Pterosaurs. Geological Society, London, Special Publications 217:5-22
Eudimorphodon_rosenfeldi	MFSN 1797	Basal	Eudimorphodontidae	NA	NA		40.5	55	21	64	58.2	63.2	51.5	37	54.2	21		Dalla Veccia 1994 A new pterosaur (Reptilia, Pterosauria) from the Norian (Late Triassic) of Friuili (northeastern Italy). Preliminary Note. Gortania 16:59-66
Eudimorphodon_rosenfeldi	MPUM 6009	Basal	Eudimorphodontidae				26.3	36	10.5	37.5	33	36.2	34	18.5	25			Dalla Veccia 2003 New morphological observations on Triassic pterosaurs. From: Buffetaut & Mazin (eds) 2003 Evolution and Palaeobiology of Pterosaurs. Geological Society, London, Special Publications 217:23-46
Eurazhdarcho_langendorfensis	EME VP 312/6	Pterodactyloid	Azdarchidae	NA	NA		NA	NA	250	NA	NA	NA	NA	NA	NA	NA		Vremir M et al 2013 A New Azhdarchid Pterosaur from the Late Cretaceous of the Transylvanian Basin, Romania: Implications for Azhdarchid Diversity and Distribution. PLoS ONE 8(1): e54268. doi:10.1371/journal.pone.0054268
Europejara_olcadesorum	MCCM-LH 9413	Pterodactyloid	Tapejaridae		255		NA	NA	NA	NA	NA	NA	NA	NA	NA	NA		Vullo et al. 2012. A new crested pterosaur from the Early Cretaceous of Spain: the first European tapejarid (Pterodactyloidea: Azhdarchoidea). PLoS One 7: e38900. doi:10.1371/journal.pone.0038900.
Feilongus_sp.	DNHM D3068	Pterodactyloid	Ctenochasmatidae	320		7	NA	NA	NA	NA	NA	NA	NA	NA	NA	NA		Wang et al. 2005 Pterosaur diversity and faunal turnover in Cretaceous terrestrial ecosystems in China. Nature 437: 875-979
Feilongus_youngi	IVPP V-12539	Pterodactyloid	Ctenochasmatidae	390	334		NA	NA	NA	NA	NA	NA	NA	NA	NA	NA	Subadult, number of cranial elements unfused	Wang et al. 2014 New material of Feilongus (Reptilia: Pterosauria) from the Lower Cretaceous Jiufotang Formation of Western Liaoning. Acta Geologica Sinica (English Edition) 88: 13-17
Gallodactylus_canjuersensis	MNHN CNJ71	Pterodactyloid	Ctenochasmatoidea	NA	NA		NA	NA	NA	>152.5	132	94.3	>67	103	144	35.5		Bennett 2012. The morphology and taxonomy of the pterosaur Cycnorhamphus. N. Jb. Geol. Paläont. Abh. 267: 23–41
Gegepterus_changi	IVPP V-11981	Pterodactyloid	Ctenochasmatidae	165	142		52.7	69.3	68.3	NA	>38	NA	NA	NA	NA	NA	Scapula and coracoid unfused, several cranial bones also unfused	Wang et al. 2007 A new pterosaur (Ctenochasmatidae, archaeopterodactyloidea) from the Lower Cretaceous Yixian Formation. Cretaceous Research 28: 245-260
Germanodactylus_cristatus	BSt 1892 IV 1	Pterodactyloid	Germanodactylidae	130	103.5	8.8	56	75	66	84	77.5	65.5	55	56.5	87.5	24		Wellnhofer 1970. Die Pterodactyloidea (Pterosauria) der Oberjura- Plattenkalke Suddeutschlands. Bayerische Akademie der Wissenschaften, Mathematisch-Wissenschaftlichen Klasse, Abhandlungen 141: 1–133. Unwin et al. 2000 On the systematic and stratigraphic
Germanodactylus_rhamphastinus	BSt AS I 745	Pterodactyloid	Germanodactylidae	210	178	-	60	100	70	90	80	72	60	67	92	-		Wellnhofer 1970. Die Pterodactyloidea (Pterosauria) der Oberjura- Plattenkalke Suddeutschlands. Bayerische Akademie der Wissenschaften, Mathematisch-Wissenschaftlichen Klasse, Abhandlungen 141: 1–133. Wellnhofer 1978. Pterosauria. Springer Verlag, Stuttgart.
Germanodactylus_rhamphastinus	MCZ 1886	Pterodactyloid	Germanodactylidae	151	NA	NA	NA	NA	55.1	72.3	NA	NA	NA	NA	NA	NA		Bennett 2002 Soft tissue preservation of the cranial crest of the pterosaur Germanodactylus from Solnhofen. Journal of Vertebrate Paleontology 22: 43-48
Gladocephaloideus_jingangshanensis	IG-CAGS-08-07	Pterodactyloid	Ctenochasmatidae	182	175		NA	NA	NA	NA	NA	NA	NA	NA	87	38		Lü et al. 2012 A new ctenochasmatoid pterosaur from the Early Cretaceous Yixian Formation of western Liaoning, China. Cretaceous Research 34: 26-30
Gladocephaloideus_jingangshanensis	JPM 2014-004	Pterodactyloid	Ctenochasmatidae	108.8	87.9	3.64	30	40	32.4	45.5	42.1	37.5	33.3	27.5	45	18.6	"Early stage juvenile". Scapula and coracoid unfused, extensor process of wing phalanx 1 not fused, ephiphyses of wing phanlanges poorly ossified.	Lü et al. 2016 New Material of the Pterosaur Gladocephaloideus Lü et al., 2012 from the Early Cretaceous of Liaoning Province, China, with Comments on Its Systematic Position. PLoS ONE 11(6): e0154888. doi:10.1371/ journal.pone.0154888
Gnathosaurus_subulatus	BSt AS VII 369	Pterodactyloid	Ctenochasmatidae	~230	~200		NA	NA	NA	NA	NA	NA	NA	NA	NA	NA		Wellnhofer 1970. Die Pterodactyloidea (Pterosauria) der Oberjura- Plattenkalke Suddeutschlands. Bayerische Akademie der Wissenschaften, Mathematisch-Wissenschaftlichen Klasse, Abhandlungen 141: 1–133.
Gnathosaurus_subulatus	PTH 1951. 84	Pterodactyloid	Ctenochasmatidae	280	NA	NA	NA	NA	NA	NA	NA	NA	NA	NA	NA	NA		Wellnhofer 1970. Die Pterodactyloidea (Pterosauria) der Oberjura- Plattenkalke Suddeutschlands. Bayerische Akademie der Wissenschaften, Mathematisch-Wissenschaftlichen Klasse, Abhandlungen 141: 1–133.
Guidraco_venator	IVPP V17083	Pterodactyloid	Boreopterinae	380	330		NA	NA	NA	NA	NA	NA	NA	NA	NA	NA	subadult	Wang et al. 2012 New toothed flying reptile from Asia: close similarities between early Cretaceous pterosaur faunas from China and Brazil. Naturwissenschaften 99: 249-257
Haopterus_gracilis	IVPP V11726	Pterodactyloid	Eupterodactyloidea	145	128		70	101	89	141	119	95	>44	NA	NA	17	subadult	Wang and Lü 2001 Discovery of a pterodactyloid pterosaur from the Yixian Formation of western Liaoning, China. Chinese Science Bulletin 46: 1-6
Hongshanopterus_lacustris	IVPP V14582	Pterodactyloid	Ornithocheiromorpha	243.5	NA	NA	NA	NA	NA	NA	NA	NA	NA	NA	NA	NA		Wang et al. 2008 A primative istiodactylid pterosaur (Pterodactyloidea) from the Jiufotang Formation (Early Cretaceous), northeast China. Zootaxa 1813: 1-18
Huanhepterus_quingyangensis	IVPP V9070	Pterodactyloid	Ctenochasmatidae				145		360						130			Dong 1982 A new pterosaur (Huanhepterus quingyangensis gen. et sp. nov.) from Ordos, China. Vertebrata PalAsiatica 20: 115-121
Huaxiapterus_benxiensis	BXGM V0011	Pterodactyloid	Tapejaridae	251.9	149	11.53	62	119	133	176	130	98	33	112	154	35		Lü et al. 2007. A new species of Huaxiapterus (Pterosauria: Tapejaridae) from the Early Cretaceous of western Liaoning, China. Acta Geologica Sinica 81:683-687
Huaxiapterus_corollatus	ZMNH M8131	Pterodactyloid	Tapejaridae		133.7	16.2	79.7	114	152	176	108.5	69.4	34	92.5	155	31	Scapula and coracoid not fused, nor is extensor process of p1d4, maxilla and premaxilla fused	Lü et al 2006. A new species of Huaxiapterus (Pterosauria: Pterodactyloidea) from the Lower Cretaceous of western Liaoning, China with comments on the systematics of tapejarid pterosaurs. Acta Geologica Sinica 80:315-326
Huaxiapterus_jii	GMN 03 11 001	Pterodactyloid	Tapejaridae	NA	141	22.7	79	117	132	163	127	92	45	100	141	30	Scapula and coracoid, tarsals, and extensor process of p1d4 not fused. Premaxilla and maxilla fused	Lü and Yuan 2005 New tabejarid pterosaur from Western Liaoning, China. Acta Geologica Sinica 79: 453-458
Ikrandraco_avatar	IVPP V18199	Pterodactyloid	Ornithocheiromorpha	286.5	264		78.7	122.5	99.5	NA	NA	NA	NA	NA	NA	NA		Wang et al. 2014 An Early Cretaceous pterosaur with an unusual mandibular crest from China and a potential novel feeding strategy. Scientific Reports 4: 6329 DOI: 10.1038/srep063
Ikrandraco_avatar	IVPP V18406	Pterodactyloid	Ornithocheiromorpha	>268.3	242.1		NA	NA	NA	NA	NA	NA	NA	NA	NA	NA		Wang et al. 2014 An Early Cretaceous pterosaur with an unusual mandibular crest from China and a potential novel feeding strategy. Scientific Reports 4: 6329 DOI: 10.1038/srep063
Istiodactylus_sinensis	NGMC 99 07 11	Pterodactyloid	Istiodactylidae	354.6	320	22.2	133.5	233.7	166.8	273.1	243.5	195.4	32.9	139.5	182.5	NA	Subadult	Andres & Qiang 2006 A new species of Istiodactylus (Pterosauria, Pterodactyloidea) from the Lower Cretaceous of Liaoning, China. Journal of Vertebrate Paleontology 26: 70-78
Jeholopterus_ningchengensis	IVPP V12705	Basal	Anurognathidae	28			62	89	19	93	82	60	16	40	50	22		Wang et al. 2002 A nearly complete articulated rhamphorhynchoid pterosaur with exceptionally well-preserved wing membranes and "hairs" from Inner Mongolia, northeast China. Chinese Science Bulletin 47: 226-230. Kellner et al. 2010 The soft tissue of Jeholopterus (Pterosauria, Anurognathidae, Batrachognathinae) and the structure of the pterosaur wing membrane. Proc. R. Soc. B. 277: 321-329
Jianchangnathus_robustus	IVPP V16866	Basal	Rhamphorhynchidae	148.9	120		NA	114	31.5	78.2	89.4	NA	73.2	NA	NA	25.9	Extensor process of phalanx 1 unfused	Cheng et al 2012 A new scaphognathid pterosaur from western Liaoning, China. Historical Biology 24: 101-111
Jianchangopterus_zhaoianus	YHK-0931	Basal	Rhamphorhynchidae	43	43	NA	21.4	28.7	7.3	24.9	26	26	23.9	17	18	8.9	Subadult. Scapula and coracoid not fused, proximal metatarsals fused, tarsals ossified	Lü & Bo 2011 A new rhamphoryhnchid pterosaur (Pterosauria) from the Middle Jurassic Tiaojishan Formation of Western Liaoning, China. Acta Geologica Sinica (English Edition) 85: 977-983.
Jidapterus_edentus	CAD - 01	Pterodactyloid	Chaoyangopteridae	235	212	NA	80	110	140	170	120	80	40	95	150	40	Scapula and coracoid not fully fused	Dong et al. 2003. On a new pterosaur from the Lower Cretaceous of Chaoyang Basin, Western Liaoning, China. Global Geology 22:1-7
Kunpengopterus_sinensis	IVPP V16047	Basal	Wukongopteridae	106.9	90	4.8	36.2	59.2	23	54.2	58	59.2	48.8	39.3	54.5	21.8		Wang et al. 2010 New long-tailed pterosaurs (Wukongopteridae) from western Liaoning, China. Anais da Academia Brasileira de Ciências 82: 1045-1062
Lacusovagus_magnificens	SMNK PAL 4325	Pterodactyloid	Chaoyanopteridae	655	NA	NA	NA	NA	NA	NA	NA	NA	NA	NA	NA	NA		Witton 2008 A new azdarchid pterosaur from the Crato Formation (Lower Cretaceous, Aptian?) of Brazil. Palaeontology 51: 1289-1300.
Liaodactylus_primus	PMOL AP 00031	Pterodactyloid	Ctenochasmatidae	133			NA	NA	NA	NA	NA	NA	NA	NA	NA	NA		Zhou et al. 2017 Earliest filter-feeding pterosaur from the Jurassic of China and ecological evolution of Pterodactyloidea. R. Soc. open sci. 4: 160672. http://dx.doi.org/10.1098/rsos.160672
Liaoningopterus_gui	IVPP V 13291	Pterodactyloid	Anhangueridae	610	NA	NA	NA	NA	NA	NA	NA	NA	NA	NA	NA	NA		Wang & Zhou 2003 A new pterosaur (Pterodactyloidea, Tapejaridae) from the Early Cretaceous Jiufotang Formation of western Liaoning and its implications for biostratigraphy. Chinese Science Bulletin 48: 16-23.
Liaoxipterus_brachyognathus	CAR 0018	Pterodactyloid	Istiodactylidae	NA	182	NA	NA	NA	NA	NA	NA	NA	NA	NA	NA	NA		Lü et al 2008 Restudy of Liaoxipterus (Istiodactylidae: Pterosauria), with comments on the Chinese istiodactylid pterosaurs. Zitteliana B28: 229-241
Longchengopterus_zhaoi	LPM 0003	Pterodactyloid	Istiodactylidae	263.9	226.9	NA	88.3	156	101	188	157	120	100	100	NA	NA		Lü et al 2008 Restudy of Liaoxipterus (Istiodactylidae: Pterosauria), with comments on the Chinese istiodactylid pterosaurs. Zitteliana B28: 229-241
Microtuban_altivolans	SMNK PAL 6595	Pterodactyloid	Azdarchoidea	NA	NA	NA	67.5	92	122	135	114.5	63.5	3.5	NA	NA	NA	Juvenile/subadult. Scapula & coracoids, and extensor process of p1d4 unfused. Bone grain well developed	Elgin & Frey 2011 A new azhdarchoid pterosaur from the Cenomanian (Late Cretaceous) of Lebanon. Swiss Journal of Geosciences 104 (Suppl 1):S21-S33
Moganopterus_zhui	JPM-10-089	Pterodactyloid	Boreopteridae	750	685			NA	NA	NA	NA	NA	NA	NA	NA	NA		Lü et al. 2012. Largest toothed pterosaur skull from the Early Cretacous Yixian Formation of Western Liaoning, China, with comments on the Family Boreopteridae. Acta Geologica Sinica 86:287-293.
Montanazdarcho_minor	MOR 691	Pterodactyloid	Azdarchidae	NA	NA	NA	115	190	169	>195	NA	NA	NA	NA	NA	NA		McGowan et al. 2002. Description of Montanazhdarcho minor, an azhdarchid pterosaur from the Two Medicine Formation (Campanian) of Montana. PaleoBios 22:1-9
Muzquiopteryx_coahuilensis	IGM 8621	Pterodactyloid	Nyctosauridae	NA	NA		81	112	NA	NA	NA	NA	NA	78	109	22		Frey et al 2006 Muzquizopteryx coahuilensis n.g., n. sp., a nyctosaurid pterosaur with soft tissue preservation from the Coniacian (Late Cretaceous) of northeast Mexico (Coahuila). Oryctos 6: 19-39
Nemicolopterus_crypticus	IVPP V 14377	Pterodactyloid	Tapejaromorpha	40.3	26.3		15.2	20	NA	22.5	20.9	16.2		16.5	23.1		Scapula-coracoid, and synsacrum unfused, juvenile? But epiphyses of long bones well ossified	Wang et al. 2008 Discovery of a rare arboreal first-dwelling reptile (Pterosauria: Pterodactyloidea) from China. PNAS 105: 1983-1987
Nesodactylus_hesperius	AMNH 2000	Basal	Rhamphorhynchidae	NA	NA		46.5	80	26.7	137	NA	NA	NA	NA	NA	NA		Colbert 1969 A Jurassic pterosaur from Cuba. American Museum Notivates 2370: 1:26
Ningchengopterus_liuae	CYGB 0035	Pterodactyloid	?	38	32	1.04	15	20	15	20	19.5	14	NA	14	NA	NA	Juvenile, all elements of the skeleton unfused and poorly ossified	Lü 2009 A baby pterodactyloid pterosaur from the Yixian Formation of Ningcheng, Inner Mongolia, China. Acta Geologica Sinica 83: 1-8
Noripterus_complicidens	GIN125/1010	Pterodactyloid	Dsungariptidae	210	179		84	118.6	161	182.8	>136	NA	NA	106	181			Lü et al. 2009 New material of dsungaripterid pterosaurs (Pterosauria: Pterodactyloidea) from western Mongolia and its palaeoecological implications. Geol Mag 146: 690-700
Nurhacius_ignaciobritoi	IVPP V-13288	Pterodactyloid	Istiodactylidae	320	291													Wang et al. 2005 Pterosaur diversity and faunal turnover in Cretaceous terrestrial ecosystems in China. Nature 437: 875-979
Nyctosaurus	KJ1	Pterodactyloid	Nyctosauridae	245	242		61.8	107	202	NA	NA	NA	NA	NA	NA	NA		Bennett 2003 New crested specimens of the Late Cretaceous pterosaur Nyctosaurus. Paläontologische Zeitshrift 77: 61-75
Nyctosaurus	KJ2	Pterodactyloid	Nyctosauridae	316	299	-	72.3	142	243	289	152	113	-	71.9	83.8	NA		Bennett 2003 New crested specimens of the Late Cretaceous pterosaur Nyctosaurus. Paläontologische Zeitshrift 77: 61-75
Nyctosaurus_sp.	SMM 11311	Pterodactyloid	Nyctosauridae	300	265		97	NA	297	262	253	217	128	84	120			Miller 1971 The taxonomy of the Pteranodon species from Kansas. Transactions of the Kansas Academy of Science (1903-), Vol. 74: 1-19
Orientognathus_chaoyangensis	41HIII-0418	Basal	Rhamphorhynchidae	NA	105.6	9	77.2	65.1	29.3	85.7	118.3	NA	NA	68.3	69.1	35.3	Immature; scapula-coracoid, sacrum, and extensor process of wing phalanx 1 unfused	Lü et al. 2015. A new rhamphorhynchid pterosaur (Pterosauria) from Jurassic deposits of Liaoning Province, China. ZooTaxa 3911: 119–129
Peteinosaurus_zambelli	MCSNB 2886	Basal	Eudimorphodontidae	NA	NA		NA	NA	16.5	42.5	41	NA	34	NA	51.5		Skull elements not fully fused	Dalla Veccia 2003 New morphological observations on Triassic pterosaurs. From: Buffetaut & Mazin (eds) 2003 Evolution and Palaeobiology of Pterosaurs. Geological Society, London, Special Publications 217:23-48
Peteinosaurus_zambelli	MCNSB 3359	Basal	Eudimorphodontidae	NA	NA		39	49.5	17	42.5	42.5	46.5	35	37	48	18.3	Tarsals not fused to tibia, sacrum unfused, grainy bone texture	Dalla Veccia 2003 New morphological observations on Triassic pterosaurs. From: Buffetaut & Mazin (eds) 2003 Evolution and Palaeobiology of Pterosaurs. Geological Society, London, Special Publications 217:23-48
Preondactylus_buffarinii	MFSN 1770	Basal	Preondactylia	~54	50.2	4.932	32	42	14.25	35.5	39	39	28	32.5	44	16	Skull elements and scapula-coracoid not fully fused	Dalla Veccia 2003 New morphological observations on Triassic pterosaurs. From: Buffetaut & Mazin (eds) 2003 Evolution and Palaeobiology of Pterosaurs. Geological Society, London, Special Publications 217:23-48
Pteranodon_longiceps	SMM 11402	Pterodactyloid	Pteranodontoidea	NA	NA	NA	200	255	>387	482	NA	NA	NA	188	NA	80		Miller 1971 A skull of Pteranodon (Longicepia) longiceps Marsh associated with wing and body bones. Transactions of the Kansas Academy of Science (1903-) 74: 20-33
Pteranodon_longiceps	YPM 2425	Pterodactyloid	Pteranodontoidea				155	217	360	NA	NA	NA	NA	NA	NA	NA		Miller 1971 A skull of Pteranodon (Longicepia) longiceps Marsh associated with wing and body bones. Transactions of the Kansas Academy of Science (1903-) 74: 20-34
Pteranodon_sternbergi	YPM 2493	Pterodactyloid	Pteranodontoidea				202	290	454	550	474	NA	NA	192	290	NA		Miller 1971 A skull of Pteranodon (Longicepia) longiceps Marsh associated with wing and body bones. Transactions of the Kansas Academy of Science (1903-) 74: 20-35
Pteranodon_sp.	SMM 10598	Pterodactyloid	Pteranodontoidea	NA	NA	NA	265	330	610	NA	NA	NA	NA	230	310	90		Sternberg & Walker 1958 Observation of articulated limb bones of a recently discovered Pteranodon in the Niobrara Cretaceous of Kansas. Transactions of the Kansas Academy of Science (1903-) 61: 81-85
Pteranodon_sp.	SMM 2085	Pterodactyloid	Pteranodontoidea				280	405	585	653	555	389	193	NA	NA	NA		Miller 1971 A skull of Pteranodon (Longicepia) longiceps Marsh associated with wing and body bones. Transactions of the Kansas Academy of Science (1903-) 74: 20-37
Pteranodon_sp.	YPM 2616	Pterodactyloid	Pteranodontoidea				180	260	NA	510	NA	NA	NA	190	NA	NA		Miller 1971 A skull of Pteranodon (Longicepia) longiceps Marsh associated with wing and body bones. Transactions of the Kansas Academy of Science (1903-) 74: 20-38
Pteranodon_sp.	SMU 76476	Pterodactyloid	Pteranodontoidea	NA	NA	NA	145	NA	NA	NA	NA		NA	NA	NA	NA		Myers 2010 Earliest occurrence of the Pteranodontidae (Archosauria: Pterosauria) in North America: new material from the Austin Group, Texas. Journal of Vertebrate Paleontology 84: 1071-1081.
Pterodactylus_antiquus	TM 10341	Pterodactyloid	Euctenochasmatia	44	34.7		13	19.5	14.3	19.2	17.9	16.2	15	15.4	19.2	-	Juvenile	Wellnhofer 1970. Die Pterodactyloidea (Pterosauria) der Oberjura- Plattenkalke Suddeutschlands. Bayerische Akademie der Wissenschaften, Mathematisch-Wissenschaftlichen Klasse, Abhandlungen 141: 1–133.
Pterodactylus_antiquus	BSt 1968 I 95	Pterodactyloid	Euctenochasmatia	NA	76		29.5	41.5	31.5	44	40.5	38	30	31	44	-		Wellnhofer 1970. Die Pterodactyloidea (Pterosauria) der Oberjura- Plattenkalke Suddeutschlands. Bayerische Akademie der Wissenschaften, Mathematisch-Wissenschaftlichen Klasse, Abhandlungen 141: 1–133.
Pterodactylus_antiquus	HM	Pterodactyloid	Euctenochasmatia	NA	83		30.5	45	30	48.5	41	37	30.5	35	46.5	-		Wellnhofer 1970. Die Pterodactyloidea (Pterosauria) der Oberjura- Plattenkalke Suddeutschlands. Bayerische Akademie der Wissenschaften, Mathematisch-Wissenschaftlichen Klasse, Abhandlungen 141: 1–133.
Pterodactylus_antiquus	BSt I 739	Pterodactyloid	Euctenochasmatia	108	92	4.5	31.5	47	35	48.5	44.2	37	28.5	34.7	48.5	19		Wellnhofer 1970. Die Pterodactyloidea (Pterosauria) der Oberjura- Plattenkalke Suddeutschlands. Bayerische Akademie der Wissenschaften, Mathematisch-Wissenschaftlichen Klasse, Abhandlungen 141: 1–133. Unwin et al. 2000 On the systematic and stratigraphic significance of pterosaurs from the Lower Cretaceous Yixian Formation (Jehol Group) of Liaoning, China. Mitt.Mus.Nat.kd.Berl., Geowiss. 3:181-20…
Pterodactylus_antiquus	RM St 18184	Pterodactyloid	Euctenochasmatia	140	NA		43.7	60	44	53	57.5	50.5	39	45	59	-		Wellnhofer 1970. Die Pterodactyloidea (Pterosauria) der Oberjura- Plattenkalke Suddeutschlands. Bayerische Akademie der Wissenschaften, Mathematisch-Wissenschaftlichen Klasse, Abhandlungen 141: 1–133.
Pterodactylus_antiquus	BSt 1967 I 276	Pterodactyloid	Euctenochasmatia	23	15.5		12.3	15.5	10.5	14.6	12.5	13.2	12.5	11	12.2	-	Juvenile	Wellnhofer 1970. Die Pterodactyloidea (Pterosauria) der Oberjura- Plattenkalke Suddeutschlands. Bayerische Akademie der Wissenschaften, Mathematisch-Wissenschaftlichen Klasse, Abhandlungen 141: 1–133.
Pterodactylus_antiquus	TM 13105	Pterodactyloid	Euctenochasmatia	25	18.2		12.8	15.7	10.2	14.8	14.3	13.2	10.5	10	13.6	-	Juvenile	Wellnhofer 1970. Die Pterodactyloidea (Pterosauria) der Oberjura- Plattenkalke Suddeutschlands. Bayerische Akademie der Wissenschaften, Mathematisch-Wissenschaftlichen Klasse, Abhandlungen 141: 1–133.
Pterodactylus_antiquus	BM 42736	Pterodactyloid	Euctenochasmatia	25.5	NA		12	14.5	10.5	13.5	13	11.5	NA	10	NA	-	Juvenile	Wellnhofer 1970. Die Pterodactyloidea (Pterosauria) der Oberjura- Plattenkalke Suddeutschlands. Bayerische Akademie der Wissenschaften, Mathematisch-Wissenschaftlichen Klasse, Abhandlungen 141: 1–133.
Pterodactylus_antiquus	PTH 29.III.1950	Pterodactyloid	Euctenochasmatia	25.7	18.7		14	17	12.5	16.5	15.5	14.1	13.3	11.8	15.5	-	Juvenile	Wellnhofer 1970. Die Pterodactyloidea (Pterosauria) der Oberjura- Plattenkalke Suddeutschlands. Bayerische Akademie der Wissenschaften, Mathematisch-Wissenschaftlichen Klasse, Abhandlungen 141: 1–133.
Pterodactylus_antiquus	MCZ 1503	Pterodactyloid	Euctenochasmatia	35	26.5		15.5	18.5	13	18	17.5	16	13.5	13.5	17	-	Juvenile	Wellnhofer 1970. Die Pterodactyloidea (Pterosauria) der Oberjura- Plattenkalke Suddeutschlands. Bayerische Akademie der Wissenschaften, Mathematisch-Wissenschaftlichen Klasse, Abhandlungen 141: 1–133.
Pterodactylus_antiquus	BSt 1924 V 1	Pterodactyloid	Euctenochasmatia	38	27		14.5	19	13	17.2	16.8	16.5	10	13	16.4	-	Juvenile	Wellnhofer 1970. Die Pterodactyloidea (Pterosauria) der Oberjura- Plattenkalke Suddeutschlands. Bayerische Akademie der Wissenschaften, Mathematisch-Wissenschaftlichen Klasse, Abhandlungen 141: 1–133.
Pterodactylus_antiquus	SM R 4072	Pterodactyloid	Euctenochasmatia	57.5	46		21.3	28.9	20	27	25.8	23.3	19	21.5	28	-		Wellnhofer 1970. Die Pterodactyloidea (Pterosauria) der Oberjura- Plattenkalke Suddeutschlands. Bayerische Akademie der Wissenschaften, Mathematisch-Wissenschaftlichen Klasse, Abhandlungen 141: 1–133.
Pterodactylus_antiquus	BSt 1878 VI 1	Pterodactyloid	Euctenochasmatia	68	53.7		25.6	36.5	27	34.6	32.3	27	NA	NA	36	-		Wellnhofer 1970. Die Pterodactyloidea (Pterosauria) der Oberjura- Plattenkalke Suddeutschlands. Bayerische Akademie der Wissenschaften, Mathematisch-Wissenschaftlichen Klasse, Abhandlungen 141: 1–133.
Pterodactylus_antiquus	HM	Pterodactyloid	Euctenochasmatia	70	57		25	32	22.5	30	29	27	23	23	32	-		Wellnhofer 1970. Die Pterodactyloidea (Pterosauria) der Oberjura- Plattenkalke Suddeutschlands. Bayerische Akademie der Wissenschaften, Mathematisch-Wissenschaftlichen Klasse, Abhandlungen 141: 1–133.
Pterodactylus_antiquus	BSt AS V 29	Pterodactyloid	Euctenochasmatia	71	58		23	32	23	31	29	26	21.5	22	32	-		Wellnhofer 1970. Die Pterodactyloidea (Pterosauria) der Oberjura- Plattenkalke Suddeutschlands. Bayerische Akademie der Wissenschaften, Mathematisch-Wissenschaftlichen Klasse, Abhandlungen 141: 1–133.
Pterodactylus_antiquus	PTH 1962.148	Pterodactyloid	Euctenochasmatia	73.5	60.5		24	30.5	25	32.5	31.5	27.8	23.2	24	34	-		Wellnhofer 1970. Die Pterodactyloidea (Pterosauria) der Oberjura- Plattenkalke Suddeutschlands. Bayerische Akademie der Wissenschaften, Mathematisch-Wissenschaftlichen Klasse, Abhandlungen 141: 1–133.
Pterodactylus_antiquus	MM	Pterodactyloid	Euctenochasmatia	74	60.5		26	36.5	28	34	32.5	27	25.5	26.8	34	-		Wellnhofer 1970. Die Pterodactyloidea (Pterosauria) der Oberjura- Plattenkalke Suddeutschlands. Bayerische Akademie der Wissenschaften, Mathematisch-Wissenschaftlichen Klasse, Abhandlungen 141: 1–133.
Pterodactylus_antiquus	Missing	Pterodactyloid	Euctenochasmatia															Wellnhofer 1970. Die Pterodactyloidea (Pterosauria) der Oberjura- Plattenkalke Suddeutschlands. Bayerische Akademie der Wissenschaften, Mathematisch-Wissenschaftlichen Klasse, Abhandlungen 141: 1–133.
Pterodactylus_antiquus	ES	Pterodactyloid	Euctenochasmatia	83	65		26.5	40	27	35	34.3	31.8	26	29	38.9	-		Wellnhofer 1970. Die Pterodactyloidea (Pterosauria) der Oberjura- Plattenkalke Suddeutschlands. Bayerische Akademie der Wissenschaften, Mathematisch-Wissenschaftlichen Klasse, Abhandlungen 141: 1–133.
Pterodactylus_antiquus	AM 1942	Pterodactyloid	Euctenochasmatia	83	67.5		31	39	29	39	35.5	33.5	27	28.5	39.5	-		Wellnhofer 1970. Die Pterodactyloidea (Pterosauria) der Oberjura- Plattenkalke Suddeutschlands. Bayerische Akademie der Wissenschaften, Mathematisch-Wissenschaftlichen Klasse, Abhandlungen 141: 1–133.
Pterodactylus_antiquus	BSt 1937 I 18	Pterodactyloid	Euctenochasmatia	83	65		29	39	27.5	38.5	36.5	32.5	27	28.5	38.5	14.5		Wellnhofer 1970. Die Pterodactyloidea (Pterosauria) der Oberjura- Plattenkalke Suddeutschlands. Bayerische Akademie der Wissenschaften, Mathematisch-Wissenschaftlichen Klasse, Abhandlungen 141: 1–133. Unwin et al. 2000 On the systematic and stratigraphic
Pterodactylus_antiquus	SM R4074	Pterodactyloid	Euctenochasmatia	83.5	68.5		29	38	27	38	37	34	26	30	38.6	-		Wellnhofer 1970. Die Pterodactyloidea (Pterosauria) der Oberjura- Plattenkalke Suddeutschlands. Bayerische Akademie der Wissenschaften, Mathematisch-Wissenschaftlichen Klasse, Abhandlungen 141: 1–133.
Diopecephalus_kochi	SM R404/BSt AS XIX 3	Pterodactyloid	Euctenochasmatia	84	67		28.5	41.5	30.5	40	36.4	31.4	25.7	30.3	41.7	-		Wellnhofer 1970. Die Pterodactyloidea (Pterosauria) der Oberjura- Plattenkalke Suddeutschlands. Bayerische Akademie der Wissenschaften, Mathematisch-Wissenschaftlichen Klasse, Abhandlungen 141: 1–133.
Pterodactylus_antiquus	PIU	Pterodactyloid	Euctenochasmatia	84	69		30	43	30	41	39	34.5	NA	32.5	42	-		Wellnhofer 1970. Die Pterodactyloidea (Pterosauria) der Oberjura- Plattenkalke Suddeutschlands. Bayerische Akademie der Wissenschaften, Mathematisch-Wissenschaftlichen Klasse, Abhandlungen 141: 1–133.
Pterodactylus_antiquus	Bst 1929 I 18	Pterodactyloid	Euctenochasmatia	84	70		NA	NA	NA	NA	NA	NA	NA	NA	NA	-		Wellnhofer 1970. Die Pterodactyloidea (Pterosauria) der Oberjura- Plattenkalke Suddeutschlands. Bayerische Akademie der Wissenschaften, Mathematisch-Wissenschaftlichen Klasse, Abhandlungen 141: 1–133.
Pterodactylus_antiquus	PTH	Pterodactyloid	Euctenochasmatia	87.5	71		31.7	42.5	31.8	43	41.5	36.5	29	32	44	-		Wellnhofer 1970. Die Pterodactyloidea (Pterosauria) der Oberjura- Plattenkalke Suddeutschlands. Bayerische Akademie der Wissenschaften, Mathematisch-Wissenschaftlichen Klasse, Abhandlungen 141: 1–133.
Pterodactylus_antiquus	AC/MM	Pterodactyloid	Euctenochasmatia	93	78		32.5	41.5	34.5	44.5	41	35	29	32	45	-		Wellnhofer 1970. Die Pterodactyloidea (Pterosauria) der Oberjura- Plattenkalke Suddeutschlands. Bayerische Akademie der Wissenschaften, Mathematisch-Wissenschaftlichen Klasse, Abhandlungen 141: 1–133.
Pterodactylus_antiquus	BSt 1883 XVI1	Pterodactyloid	Euctenochasmatia	113.5	92.5	4.6	41	52	43.5	56	53	41	35	43.5	55	23.9		Wellnhofer 1970. Die Pterodactyloidea (Pterosauria) der Oberjura- Plattenkalke Suddeutschlands. Bayerische Akademie der Wissenschaften, Mathematisch-Wissenschaftlichen Klasse, Abhandlungen 141: 1–133. Bennett 2013. New information on body size and cranial display structures of Pterodactylus antiquus, with a revision of the genus. Paläontologische Zeitschrift 87:269-289
Pterodaustro_guinazui	MIC V263	Pterodactyloid	Ctenochasmatidae	NA	NA		112	154	117	182	175	132	93	94	145	73.7	Extensor process of phalanx 1, and tarsals unfused	Codorniú et al. 2013 First occurrence of stomach stones in pterosaurs. Journal of Vertebrate Paleontology 33:647–654
Pterodaustro_guinazui	MIC V243	Pterodactyloid	Ctenochasmatidae	NA	NA		86.5	129	100.6	152.3	143.5	112.1	88.8	78.8	129.5	NA	Scapula-coracoid and tarsals unfused	Codorniú et al. 2013 First occurrence of stomach stones in pterosaurs. Journal of Vertebrate Paleontology 33:647–654
Pterodaustro_guinazui	PVL 3860	Pterodactyloid	Ctenochasmatidae				80	102	78	116	112	86	69	60	90	50		Unwin et al. 2000 On the systematic and stratigraphic significance of pterosaurs from the Lower Cretaceous Yixian Formation (Jehol Group) of Liaoning, China. Mitt. Mus. Nat.kd. Berl., Geoziss. Reihe 3:181-206
Quetzalcoatlus_northropi	TTU P10390	Pterodactyloid	Azdarchidae				531	670	1338					899	1340			Chatterjee & Templin 2004 Posture, locomotion and paleoecology of pterosaurs. Geological Society of America Special Paper 376:1-64.
Raeticodactylus_filisurensis	BNM 14524	Basal	Raeticodactylidae	95	84	14	82	106	NA	113	109	117	83	56	84	32		Stecher 2008 A new Triassic pterosaur from Switzerland (Central Australopine Grisons), Raeticodactylus filisurensis gen. et sp. nov. Swiss Journal of Geosciences 101: 185-201.
Rhamphorynchus_muensteri	TM 6294	Basal	Rhamphorhynchidae	40	27.3		16.5	26.7	10	37	31.8	28.9	32.4	12.5	15.5	9		Wellnhofer 1975. Die Rhamphorhynchoidea (Pterosauria) der Oberjura-Plattenkalke Suddeutschlands, Teil II: Systematische Beschreibung. Palaeontographica Abteilung, A Band A 148:132–186
Rhamphorynchus_muensteri	TM 6930	Basal	Rhamphorhynchidae	NA	NA	NA	NA	NA	NA	NA	NA	NA	NA	11.8	14	NA		Wellnhofer 1975. Die Rhamphorhynchoidea (Pterosauria) der Oberjura-Plattenkalke Suddeutschlands, Teil II: Systematische Beschreibung. Palaeontographica Abteilung, A Band A 148:132–188
Rhamphorynchus_muensteri	MNHU	Basal	Rhamphorhynchidae	36			17	28	10	37.5	33	29.7	33.5	13.8	16.4	10		Wellnhofer 1975. Die Rhamphorhynchoidea (Pterosauria) der Oberjura-Plattenkalke Suddeutschlands, Teil II: Systematische Beschreibung. Palaeontographica Abteilung, A Band A 148:132–189
Rhamphorynchus_muensteri	BSt 1877 X 1	Basal	Rhamphorhynchidae	NA	NA	NA	14.5	23.8	9.6	31.1	29	27	30.8	11.5	13.7	8		Wellnhofer 1975. Die Rhamphorhynchoidea (Pterosauria) der Oberjura-Plattenkalke Suddeutschlands, Teil II: Systematische Beschreibung. Palaeontographica Abteilung, A Band A 148:132–190
Rhamphorynchus_muensteri	BSt 1889 XI 1	Basal	Rhamphorhynchidae	35	21		15.5	24	9.5	32.3	28.5	26	28.5	11.7	15	NA		Wellnhofer 1975. Die Rhamphorhynchoidea (Pterosauria) der Oberjura-Plattenkalke Suddeutschlands, Teil II: Systematische Beschreibung. Palaeontographica Abteilung, A Band A 148:132–192
Rhamphorynchus_muensteri	PIU R150 / RM St.18182	Basal	Rhamphorhynchidae	31	NA	NA	14.5	24	8	NA	27.5	24.5	23	NA	NA	NA		Wellnhofer 1975. Die Rhamphorhynchoidea (Pterosauria) der Oberjura-Plattenkalke Suddeutschlands, Teil II: Systematische Beschreibung. Palaeontographica Abteilung, A Band A 148:132–193
Rhamphorynchus_muensteri	BSt 1960 I 470	Basal	Rhamphorhynchidae	NA	NA	NA	NA	NA	NA	NA	NA	NA	NA	10.5	13.1	7.8		Wellnhofer 1975. Die Rhamphorhynchoidea (Pterosauria) der Oberjura-Plattenkalke Suddeutschlands, Teil II: Systematische Beschreibung. Palaeontographica Abteilung, A Band A 148:132–194
Rhamphorynchus_muensteri	BSt 1959 I 400	Basal	Rhamphorhynchidae	41	31.5		19	32	12	44	40	35	39	15.7	19	NA		Wellnhofer 1975. Die Rhamphorhynchoidea (Pterosauria) der Oberjura-Plattenkalke Suddeutschlands, Teil II: Systematische Beschreibung. Palaeontographica Abteilung, A Band A 148:132–195
Rhamphorynchus_muensteri	BSt 1938 I 503	Basal	Rhamphorhynchidae	41	31.5		17	29.5	11.6	40.5	38	34	40	12.5	17	9.8		Wellnhofer 1975. Die Rhamphorhynchoidea (Pterosauria) der Oberjura-Plattenkalke Suddeutschlands, Teil II: Systematische Beschreibung. Palaeontographica Abteilung, A Band A 148:132–196
Rhamphorynchus_muensteri	PTH 1966.6	Basal	Rhamphorhynchidae	33	NA	NA	16.8	27	9	35.5	30	27	28	NA	NA	NA		Wellnhofer 1975. Die Rhamphorhynchoidea (Pterosauria) der Oberjura-Plattenkalke Suddeutschlands, Teil II: Systematische Beschreibung. Palaeontographica Abteilung, A Band A 148:132–197
Rhamphorynchus_muensteri	MM	Basal	Rhamphorhynchidae	NA	NA	NA	14.5	25	9	31	26.7	26	28.5	14	15	NA		Wellnhofer 1975. Die Rhamphorhynchoidea (Pterosauria) der Oberjura-Plattenkalke Suddeutschlands, Teil II: Systematische Beschreibung. Palaeontographica Abteilung, A Band A 148:132–198
Rhamphorynchus_muensteri	MM	Basal	Rhamphorhynchidae	NA	NA	NA	14	23	11	29	26.5	23	30	12	14	NA		Wellnhofer 1975. Die Rhamphorhynchoidea (Pterosauria) der Oberjura-Plattenkalke Suddeutschlands, Teil II: Systematische Beschreibung. Palaeontographica Abteilung, A Band A 148:132–199
Rhamphorynchus_muensteri	SL 010	Basal	Rhamphorhynchidae	34	NA	NA	15.3	25.5	9.5	36	30.8	27	26.2	12.3	14.5	8.5		Wellnhofer 1975. Die Rhamphorhynchoidea (Pterosauria) der Oberjura-Plattenkalke Suddeutschlands, Teil II: Systematische Beschreibung. Palaeontographica Abteilung, A Band A 148:132–200
Rhamphorynchus_muensteri	WE 128	Basal	Rhamphorhynchidae	46.3	37.2		NA	NA	NA	NA	NA	NA	NA	14.7	18.3	10.9		Wellnhofer 1975. Die Rhamphorhynchoidea (Pterosauria) der Oberjura-Plattenkalke Suddeutschlands, Teil II: Systematische Beschreibung. Palaeontographica Abteilung, A Band A 148:132–201
Rhamphorynchus_muensteri	MB	Basal	Rhamphorhynchidae	39	30.8		18	28	11.2	39.5	36	34.2	38	13.5	18.5	10.9		Wellnhofer 1975. Die Rhamphorhynchoidea (Pterosauria) der Oberjura-Plattenkalke Suddeutschlands, Teil II: Systematische Beschreibung. Palaeontographica Abteilung, A Band A 148:132–202
Rhamphorynchus_muensteri	JS	Basal	Rhamphorhynchidae	NA	NA		15.5	25	9	32.5	28.5	25	27	10.5	14.5	8		Wellnhofer 1975. Die Rhamphorhynchoidea (Pterosauria) der Oberjura-Plattenkalke Suddeutschlands, Teil II: Systematische Beschreibung. Palaeontographica Abteilung, A Band A 148:132–203
Rhamphorynchus_muensteri	MNHU	Basal	Rhamphorhynchidae	31	21.5		16	26	10	36	29.5	27	31.5	NA	NA	NA		Wellnhofer 1975. Die Rhamphorhynchoidea (Pterosauria) der Oberjura-Plattenkalke Suddeutschlands, Teil II: Systematische Beschreibung. Palaeontographica Abteilung, A Band A 148:132–204
Rhamphorynchus_muensteri	MB	Basal	Rhamphorhynchidae	NA	NA	NA	14.5	22.5	7.8	29.3	24	22	24.8	11	12.5	7		Wellnhofer 1975. Die Rhamphorhynchoidea (Pterosauria) der Oberjura-Plattenkalke Suddeutschlands, Teil II: Systematische Beschreibung. Palaeontographica Abteilung, A Band A 148:132–205
Rhamphorynchus_muensteri	CM 11433	Basal	Rhamphorhynchidae	42	NA	NA	16.5	26	10	37.3	35	32	36	NA	NA	8.7	Proportions of the skull and lack of fusion of the pelvis, juvenile (Hone et al. 2013)	Wellnhofer 1975. Die Rhamphorhynchoidea (Pterosauria) der Oberjura-Plattenkalke Suddeutschlands, Teil II: Systematische Beschreibung. Palaeontographica Abteilung, A Band A 148:132–206
Rhamphorynchus_muensteri	MMK V 45/1	Basal	Rhamphorhynchidae	NA	NA	NA	13.5	21	8.5	30	25.3	23	26	11	13	NA		Wellnhofer 1975. Die Rhamphorhynchoidea (Pterosauria) der Oberjura-Plattenkalke Suddeutschlands, Teil II: Systematische Beschreibung. Palaeontographica Abteilung, A Band A 148:132–207
Rhamphorynchus_muensteri	MMk 1891.740	Basal	Rhamphorhynchidae	NA	NA	NA	15.5	24.7	9.5	33.2	29.3	27.3	28	NA	NA	NA		Wellnhofer 1975. Die Rhamphorhynchoidea (Pterosauria) der Oberjura-Plattenkalke Suddeutschlands, Teil II: Systematische Beschreibung. Palaeontographica Abteilung, A Band A 148:132–208
Rhamphorynchus_muensteri	BSt 1934 I 36	Basal	Rhamphorhynchidae	50.2	40		19.5	30	11.8	50	46	40	45.5	NA	NA	11		Wellnhofer 1975. Die Rhamphorhynchoidea (Pterosauria) der Oberjura-Plattenkalke Suddeutschlands, Teil II: Systematische Beschreibung. Palaeontographica Abteilung, A Band A 148:132–209
Rhamphorynchus_muensteri	PTH/GIE	Basal	Rhamphorhynchidae	57	42		24	36	14	48	42	36.5	37	18	20	12		Wellnhofer 1975. Die Rhamphorhynchoidea (Pterosauria) der Oberjura-Plattenkalke Suddeutschlands, Teil II: Systematische Beschreibung. Palaeontographica Abteilung, A Band A 148:132–210
Rhamphorynchus_muensteri	UB E 554	Basal	Rhamphorhynchidae	54.3	40.4		21.8	37.5	13.7	53.8	49.4	43.5	47	17	22	12.8		Wellnhofer 1975. Die Rhamphorhynchoidea (Pterosauria) der Oberjura-Plattenkalke Suddeutschlands, Teil II: Systematische Beschreibung. Palaeontographica Abteilung, A Band A 148:132–211
Rhamphorynchus_muensteri	BM 42738	Basal	Rhamphorhynchidae	?65	NA	NA	24.5	40	15	60	55	48.5	53	16.5	22.5	NA		Wellnhofer 1975. Die Rhamphorhynchoidea (Pterosauria) der Oberjura-Plattenkalke Suddeutschlands, Teil II: Systematische Beschreibung. Palaeontographica Abteilung, A Band A 148:132–212
Rhamphorynchus_muensteri	KS	Basal	Rhamphorhynchidae	55.5	43.2		NA	34	14	50.5	41	35	38.3	17	21	10.6		Wellnhofer 1975. Die Rhamphorhynchoidea (Pterosauria) der Oberjura-Plattenkalke Suddeutschlands, Teil II: Systematische Beschreibung. Palaeontographica Abteilung, A Band A 148:132–213
Rhamphorynchus_muensteri	JS	Basal	Rhamphorhynchidae	50	41		19	33.5	10	49.5	42.5	37.5	42.5	16	18.5	NA		Wellnhofer 1975. Die Rhamphorhynchoidea (Pterosauria) der Oberjura-Plattenkalke Suddeutschlands, Teil II: Systematische Beschreibung. Palaeontographica Abteilung, A Band A 148:132–214
Rhamphorynchus_muensteri	PTH 1954. 14	Basal	Rhamphorhynchidae	45	NA	NA	17.5	27.5	6	NA	NA	NA	NA	NA	NA	NA		Wellnhofer 1975. Die Rhamphorhynchoidea (Pterosauria) der Oberjura-Plattenkalke Suddeutschlands, Teil II: Systematische Beschreibung. Palaeontographica Abteilung, A Band A 148:132–215
Rhamphorynchus_muensteri	GIE	Basal	Rhamphorhynchidae	NA	NA	NA	20	32.6	12.5	45.7	43.3	39	44.3	NA	NA	NA		Wellnhofer 1975. Die Rhamphorhynchoidea (Pterosauria) der Oberjura-Plattenkalke Suddeutschlands, Teil II: Systematische Beschreibung. Palaeontographica Abteilung, A Band A 148:132–216
Rhamphorynchus_muensteri	SMF R 4185	Basal	Rhamphorhynchidae	NA	NA	NA	NA	NA	NA	NA	NA	NA	NA	17.3	22	12.5		Wellnhofer 1975. Die Rhamphorhynchoidea (Pterosauria) der Oberjura-Plattenkalke Suddeutschlands, Teil II: Systematische Beschreibung. Palaeontographica Abteilung, A Band A 148:132–217
Rhamphorynchus_muensteri	YPM 1778	Basal	Rhamphorhynchidae	90.5	66		31.5	56	17	95	75	74	80	NA	NA	21.3		Wellnhofer 1975. Die Rhamphorhynchoidea (Pterosauria) der Oberjura-Plattenkalke Suddeutschlands, Teil II: Systematische Beschreibung. Palaeontographica Abteilung, A Band A 148:132–218
Rhamphorynchus_muensteri	MLU	Basal	Rhamphorhynchidae	NA	NA	NA	33	56	19	91	86	77	80.5	28	36	19.5		Wellnhofer 1975. Die Rhamphorhynchoidea (Pterosauria) der Oberjura-Plattenkalke Suddeutschlands, Teil II: Systematische Beschreibung. Palaeontographica Abteilung, A Band A 148:132–219
Rhamphorynchus_muensteri	SMD	Basal	Rhamphorhynchidae	97	74		34	58	18	95	86.5	81	84.5	28	40	22.5		Wellnhofer 1975. Die Rhamphorhynchoidea (Pterosauria) der Oberjura-Plattenkalke Suddeutschlands, Teil II: Systematische Beschreibung. Palaeontographica Abteilung, A Band A 148:132–221
Rhamphorynchus_muensteri	AMNH 1943	Basal	Rhamphorhynchidae	112.5	85		38.5	67.3	21	114.1	108.6	97.7	92	35	49.5	26.2		Wellnhofer 1975. Die Rhamphorhynchoidea (Pterosauria) der Oberjura-Plattenkalke Suddeutschlands, Teil II: Systematische Beschreibung. Palaeontographica Abteilung, A Band A 148:132–222
Rhamphorynchus_muensteri	TM 6920/21	Basal	Rhamphorhynchidae	112	87		42	66.1	21.7	109	107.3	101	NA	36	50.3	26.5		Wellnhofer 1975. Die Rhamphorhynchoidea (Pterosauria) der Oberjura-Plattenkalke Suddeutschlands, Teil II: Systematische Beschreibung. Palaeontographica Abteilung, A Band A 148:132–223
Rhamphorynchus_muensteri	BM 37003	Basal	Rhamphorhynchidae	NA	NA		NA	NA	23	113	112	101	NA	32	49	27.5		Wellnhofer 1975. Die Rhamphorhynchoidea (Pterosauria) der Oberjura-Plattenkalke Suddeutschlands, Teil II: Systematische Beschreibung. Palaeontographica Abteilung, A Band A 148:132–224
Rhamphorynchus_muensteri	BSt 1867 II 2	Basal	Rhamphorhynchidae	112	90		NA	NA	NA	NA	NA	NA	NA	NA	NA	NA		Wellnhofer 1975. Die Rhamphorhynchoidea (Pterosauria) der Oberjura-Plattenkalke Suddeutschlands, Teil II: Systematische Beschreibung. Palaeontographica Abteilung, A Band A 148:132–225
Rhamphorynchus_muensteri	BSt AS VI 34	Basal	Rhamphorhynchidae	104.5	74		39.5	68.5	21	117.5	NA	NA	NA	NA	NA	NA		Wellnhofer 1975. Die Rhamphorhynchoidea (Pterosauria) der Oberjura-Plattenkalke Suddeutschlands, Teil II: Systematische Beschreibung. Palaeontographica Abteilung, A Band A 148:132–226
Rhamphorynchus_muensteri	BM 37787	Basal	Rhamphorhynchidae	NA	NA	NA	45	73.5	24	123.5	119	112	111.5	NA	NA	NA		Wellnhofer 1975. Die Rhamphorhynchoidea (Pterosauria) der Oberjura-Plattenkalke Suddeutschlands, Teil II: Systematische Beschreibung. Palaeontographica Abteilung, A Band A 148:132–227
Rhamphorynchus_muensteri	SMF R4128	Basal	Rhamphorhynchidae	103	NA	NA	38	66	21	114.5	114	106.5	101	33	48.5	NA		Wellnhofer 1975. Die Rhamphorhynchoidea (Pterosauria) der Oberjura-Plattenkalke Suddeutschlands, Teil II: Systematische Beschreibung. Palaeontographica Abteilung, A Band A 148:132–228
Rhamphorynchus_muensteri	MM	Basal	Rhamphorhynchidae	NA	67.5		32	59.5	19	92.5	87.5	80	86.5	31	42	NA		Wellnhofer 1975. Die Rhamphorhynchoidea (Pterosauria) der Oberjura-Plattenkalke Suddeutschlands, Teil II: Systematische Beschreibung. Palaeontographica Abteilung, A Band A 148:132–229
Rhamphorynchus_muensteri	PTH 1954.39b	Basal	Rhamphorhynchidae	90	70		32	NA	?18	101	97	90	89	31	38.5	24		Wellnhofer 1975. Die Rhamphorhynchoidea (Pterosauria) der Oberjura-Plattenkalke Suddeutschlands, Teil II: Systematische Beschreibung. Palaeontographica Abteilung, A Band A 148:132–230
Rhamphorynchus_muensteri	XS	Basal	Rhamphorhynchidae	?100	NA		36.5	NA	22	99	95	85	81	30	NA	NA		Wellnhofer 1975. Die Rhamphorhynchoidea (Pterosauria) der Oberjura-Plattenkalke Suddeutschlands, Teil II: Systematische Beschreibung. Palaeontographica Abteilung, A Band A 148:132–231
Rhamphorynchus_muensteri	PMZ A/III 107	Basal	Rhamphorhynchidae	NA	68		31	56.7	17.3	83	78.5	70	69.9	36.7	NA	20		Wellnhofer 1975. Die Rhamphorhynchoidea (Pterosauria) der Oberjura-Plattenkalke Suddeutschlands, Teil II: Systematische Beschreibung. Palaeontographica Abteilung, A Band A 148:132–232
Rhamphorynchus_muensteri	HLD V432	Basal	Rhamphorhynchidae	92	67		34	56	19.5	92	91	NA	NA	28.5	37.3	NA		Wellnhofer 1975. Die Rhamphorhynchoidea (Pterosauria) der Oberjura-Plattenkalke Suddeutschlands, Teil II: Systematische Beschreibung. Palaeontographica Abteilung, A Band A 148:132–233
Rhamphorynchus_muensteri	BSt 1955 I 28	Basal	Rhamphorhynchidae	110	85		42	72.5	25	120	112	NA	NA	37	51.5	29		Wellnhofer 1975. Die Rhamphorhynchoidea (Pterosauria) der Oberjura-Plattenkalke Suddeutschlands, Teil II: Systematische Beschreibung. Palaeontographica Abteilung, A Band A 148:132–234
Rhamphorynchus_muensteri	ES	Basal	Rhamphorhynchidae	98.5	NA	NA	35.5	64	22.3	100	94	85	79	30.8	43.5	24.5		Wellnhofer 1975. Die Rhamphorhynchoidea (Pterosauria) der Oberjura-Plattenkalke Suddeutschlands, Teil II: Systematische Beschreibung. Palaeontographica Abteilung, A Band A 148:132–235
Rhamphorynchus_muensteri	MNHU	Basal	Rhamphorhynchidae	102	80		37	60	21	102.5	100	NA	86.5	30	NA	NA		Wellnhofer 1975. Die Rhamphorhynchoidea (Pterosauria) der Oberjura-Plattenkalke Suddeutschlands, Teil II: Systematische Beschreibung. Palaeontographica Abteilung, A Band A 148:132–236
Rhamphorynchus_muensteri	BSt 1929 I 69	Basal	Rhamphorhynchidae	169	120		59	99	34	178	NA	NA	NA	52	71.5	39		Wellnhofer 1975. Die Rhamphorhynchoidea (Pterosauria) der Oberjura-Plattenkalke Suddeutschlands, Teil II: Systematische Beschreibung. Palaeontographica Abteilung, A Band A 148:132–237
Rhamphorynchus_muensteri	CM 11429	Basal	Rhamphorhynchidae	90	70		36	61.5	20	88.5	84	76	NA	NA	38.5	22		Wellnhofer 1975. Die Rhamphorhynchoidea (Pterosauria) der Oberjura-Plattenkalke Suddeutschlands, Teil II: Systematische Beschreibung. Palaeontographica Abteilung, A Band A 148:132–238
Rhamphorynchus_muensteri	CM 11432	Basal	Rhamphorhynchidae	?90	NA	NA	34.5	59	19.7	96	91	83	88	28.5	40.5	NA		Wellnhofer 1975. Die Rhamphorhynchoidea (Pterosauria) der Oberjura-Plattenkalke Suddeutschlands, Teil II: Systematische Beschreibung. Palaeontographica Abteilung, A Band A 148:132–239
Rhamphorynchus_muensteri	BM R2786	Basal	Rhamphorhynchidae	95	75		38	62	19	102	94	86.5	80	30	NA	NA		Wellnhofer 1975. Die Rhamphorhynchoidea (Pterosauria) der Oberjura-Plattenkalke Suddeutschlands, Teil II: Systematische Beschreibung. Palaeontographica Abteilung, A Band A 148:132–240
Rhamphorynchus_muensteri	CM 11431	Basal	Rhamphorhynchidae	101.5	78		39	60	19	100	95	NA	NA	31	48	NA		Wellnhofer 1975. Die Rhamphorhynchoidea (Pterosauria) der Oberjura-Plattenkalke Suddeutschlands, Teil II: Systematische Beschreibung. Palaeontographica Abteilung, A Band A 148:132–241
Rhamphorynchus_muensteri	BSt AS I 771	Basal	Rhamphorhynchidae	NA	NA		40	62.5	21	105.4	99	89.5	90.5	NA	NA	NA		Wellnhofer 1975. Die Rhamphorhynchoidea (Pterosauria) der Oberjura-Plattenkalke Suddeutschlands, Teil II: Systematische Beschreibung. Palaeontographica Abteilung, A Band A 148:132–242
Rhamphorynchus_muensteri	BSt 1927 I 37	Basal	Rhamphorhynchidae	105	82		NA	NA	21.5	101	103	95	NA	35	48	NA		Wellnhofer 1975. Die Rhamphorhynchoidea (Pterosauria) der Oberjura-Plattenkalke Suddeutschlands, Teil II: Systematische Beschreibung. Palaeontographica Abteilung, A Band A 148:132–243
Rhamphorynchus_muensteri	CM 11427	Basal	Rhamphorhynchidae	95.6	76.7	~3.6	41	68.3	24.5	99.4	104.2	93.2	86.8	29.1	50.2	24.6		Hone et al. 2013. An annotated and illustrated catalogue of Solnhofen (Upper Jurassic, Germany) pterosaur specimens at Carnegie Museum of Natural History. Annals of Carnegie Museum 82(2) 165–191.
Rhamphorynchus_muensteri	BSt 1907 I 37	Basal	Rhamphorhynchidae	NA	NA	NA	NA	NA	25	NA	NA	100	98	35.5	52	NA		Wellnhofer 1975. Die Rhamphorhynchoidea (Pterosauria) der Oberjura-Plattenkalke Suddeutschlands, Teil II: Systematische Beschreibung. Palaeontographica Abteilung, A Band A 148:132–245
Rhamphorynchus_muensteri	BSt AS I 772 /MNHU 69/2191b	Basal	Rhamphorhynchidae	106	NA	NA	?42	?70	21	120	118	109.5	102.5	36	53.5	29		Wellnhofer 1975. Die Rhamphorhynchoidea (Pterosauria) der Oberjura-Plattenkalke Suddeutschlands, Teil II: Systematische Beschreibung. Palaeontographica Abteilung, A Band A 148:132–246
Rhamphorynchus_muensteri	WE	Basal	Rhamphorhynchidae	104	81		40.5	67	21	111	108	99	92	NA	51	27.5		Wellnhofer 1975. Die Rhamphorhynchoidea (Pterosauria) der Oberjura-Plattenkalke Suddeutschlands, Teil II: Systematische Beschreibung. Palaeontographica Abteilung, A Band A 148:132–247
Rhamphorynchus_muensteri	WE	Basal	Rhamphorhynchidae	103.5	NA	NA	41	71	22.5	110	109	99.5	99	35.7	50.5	NA		Wellnhofer 1975. Die Rhamphorhynchoidea (Pterosauria) der Oberjura-Plattenkalke Suddeutschlands, Teil II: Systematische Beschreibung. Palaeontographica Abteilung, A Band A 148:132–248
Rhamphorynchus_muensteri	ES	Basal	Rhamphorhynchidae	92	NA	NA	34.5	57.5	19.5	96	92	81	81	NA	NA	NA		Wellnhofer 1975. Die Rhamphorhynchoidea (Pterosauria) der Oberjura-Plattenkalke Suddeutschlands, Teil II: Systematische Beschreibung. Palaeontographica Abteilung, A Band A 148:132–249
Rhamphorynchus_muensteri	ES	Basal	Rhamphorhynchidae	?80	NA	NA	31	55	19	88	81	72	68.5	NA	NA	NA		Wellnhofer 1975. Die Rhamphorhynchoidea (Pterosauria) der Oberjura-Plattenkalke Suddeutschlands, Teil II: Systematische Beschreibung. Palaeontographica Abteilung, A Band A 148:132–250
Rhamphorynchus_muensteri	XS	Basal	Rhamphorhynchidae	NA	NA	NA	44	68	NA	117	105	NA	NA	36.5	53	27.5		Wellnhofer 1975. Die Rhamphorhynchoidea (Pterosauria) der Oberjura-Plattenkalke Suddeutschlands, Teil II: Systematische Beschreibung. Palaeontographica Abteilung, A Band A 148:132–251
Rhamphorynchus_muensteri	MSA	Basal	Rhamphorhynchidae	95	71		35.5	58	16.7	93	87.5	78	75.5	NA	43	NA		Wellnhofer 1975. Die Rhamphorhynchoidea (Pterosauria) der Oberjura-Plattenkalke Suddeutschlands, Teil II: Systematische Beschreibung. Palaeontographica Abteilung, A Band A 148:132–252
Rhamphorynchus_muensteri	GPK	Basal	Rhamphorhynchidae	78.7	59		29.5	53.7	19	NA	NA	NA	NA	25.5	34.5	NA		Wellnhofer 1975. Die Rhamphorhynchoidea (Pterosauria) der Oberjura-Plattenkalke Suddeutschlands, Teil II: Systematische Beschreibung. Palaeontographica Abteilung, A Band A 148:132–253
Rhamphorynchus_muensteri	MSA	Basal	Rhamphorhynchidae	?95	72		40	58	20	99	95	86	81.5	NA	NA	NA		Wellnhofer 1975. Die Rhamphorhynchoidea (Pterosauria) der Oberjura-Plattenkalke Suddeutschlands, Teil II: Systematische Beschreibung. Palaeontographica Abteilung, A Band A 148:132–254
Rhamphorynchus_muensteri	PU 11984	Basal	Rhamphorhynchidae	94	NA		35	60	20	96.5	94	86	NA	30.5	39	NA		Wellnhofer 1975. Die Rhamphorhynchoidea (Pterosauria) der Oberjura-Plattenkalke Suddeutschlands, Teil II: Systematische Beschreibung. Palaeontographica Abteilung, A Band A 148:132–255
Rhamphorynchus_muensteri	MMK 1891.738	Basal	Rhamphorhynchidae	NA	55.6		30	50.5	17.3	80.5	70.5	62.5	62	25.3	NA	17.5		Wellnhofer 1975. Die Rhamphorhynchoidea (Pterosauria) der Oberjura-Plattenkalke Suddeutschlands, Teil II: Systematische Beschreibung. Palaeontographica Abteilung, A Band A 148:132–256
Rhamphorynchus_muensteri	MNHU 3965-3967	Basal	Rhamphorhynchidae	100	NA	NA	NA	64	21	NA	NA	NA	NA	27	46	NA		Wellnhofer 1975. Die Rhamphorhynchoidea (Pterosauria) der Oberjura-Plattenkalke Suddeutschlands, Teil II: Systematische Beschreibung. Palaeontographica Abteilung, A Band A 148:132–257
Rhamphorynchus_muensteri	SMS	Basal	Rhamphorhynchidae	NA	NA	NA	35	NA	NA	NA	102.3	NA	NA	31	42	NA		Wellnhofer 1975. Die Rhamphorhynchoidea (Pterosauria) der Oberjura-Plattenkalke Suddeutschlands, Teil II: Systematische Beschreibung. Palaeontographica Abteilung, A Band A 148:132–258
Rhamphorynchus_muensteri	MTM V 2008.33.1	Basal	Rhamphorhynchidae	101	75		34	60	19.4	98.8	92.2	82.6	75.9	30	NA	21.5		Ősi & Prondvai 2009 Forgotten pterosaurs in Hungarian collections: first description of Rhamporhynchus and Pterodactylus specimens. N. Jb. Geol. Palä. Abh. 252: 167-180
Rhamphorhynchus_muensteri	TMP 2008.41.001	Basal	Rhamphorhynchidae	91			33	62	19	96	98	93	94	495	26	38	Subadult	Hone et al. 2015. A specimen of Rhamphorhynchus with soft tissue preservation, stomach contents and a putative coprolite. PeerJ DOI 10.7717/peerj.1191
Rhamphorynchus_muensteri	TM 6922/23	Basal	Rhamphorhynchidae	124.3	92.5		NA	NA	NA	NA	NA	NA	NA	NA	NA	NA		Wellnhofer 1975. Die Rhamphorhynchoidea (Pterosauria) der Oberjura-Plattenkalke Suddeutschlands, Teil II: Systematische Beschreibung. Palaeontographica Abteilung, A Band A 148:132–258
Rhamphorynchus_muensteri	GPIH MYE.13	Basal	Rhamphorhynchidae	123.3	89		38.5	61	18	102.5	100	90.5	94.3	27.5	41	23.5		Wellnhofer 1975. Die Rhamphorhynchoidea (Pterosauria) der Oberjura-Plattenkalke Suddeutschlands, Teil II: Systematische Beschreibung. Palaeontographica Abteilung, A Band A 148:132–258
Rhamphorynchus_muensteri	USNM 2420	Basal	Rhamphorhynchidae	116	78	3.7	41	71	22	112	110	103	101.5	30	50.6	28		Wellnhofer 1975. Die Rhamphorhynchoidea (Pterosauria) der Oberjura-Plattenkalke Suddeutschlands, Teil II: Systematische Beschreibung. Palaeontographica Abteilung, A Band A 148:132–258
Rhamphorynchus_muensteri	PTH	Basal	Rhamphorhynchidae	125	NA	NA	43	68	20	113	108.5	98.5	102	30	44	28.8		Wellnhofer 1975. Die Rhamphorhynchoidea (Pterosauria) der Oberjura-Plattenkalke Suddeutschlands, Teil II: Systematische Beschreibung. Palaeontographica Abteilung, A Band A 148:132–258
Rhamphorynchus_muensteri	MM	Basal	Rhamphorhynchidae	91	66		NA	NA	NA	NA	NA	NA	NA	NA	38.5	NA		Wellnhofer 1975. Die Rhamphorhynchoidea (Pterosauria) der Oberjura-Plattenkalke Suddeutschlands, Teil II: Systematische Beschreibung. Palaeontographica Abteilung, A Band A 148:132–258
Rhamphorynchus_muensteri	ES	Basal	Rhamphorhynchidae	NA	NA	NA	36	61.5	21	99.5	99	92.5	94	26	38.5	NA		Wellnhofer 1975. Die Rhamphorhynchoidea (Pterosauria) der Oberjura-Plattenkalke Suddeutschlands, Teil II: Systematische Beschreibung. Palaeontographica Abteilung, A Band A 148:132–258
Rhamphorynchus_muensteri	MB	Basal	Rhamphorhynchidae	87	64		33	58.5	NA	93.5	87	NA	NA	NA	38.5	NA		Wellnhofer 1975. Die Rhamphorhynchoidea (Pterosauria) der Oberjura-Plattenkalke Suddeutschlands, Teil II: Systematische Beschreibung. Palaeontographica Abteilung, A Band A 148:132–259
Rhamphorynchus_muensteri	MT	Basal	Rhamphorhynchidae	150	130		64.5	96	35	149	NA	NA	NA	45.5	64	34		Wellnhofer 1975. Die Rhamphorhynchoidea (Pterosauria) der Oberjura-Plattenkalke Suddeutschlands, Teil II: Systematische Beschreibung. Palaeontographica Abteilung, A Band A 148:132–260
Rhamphorynchus_muensteri	BM 37002	Basal	Rhamphorhynchidae	191.5	164		79	NA	NA	202	169	140	136	NA	NA	44		Wellnhofer 1975. Die Rhamphorhynchoidea (Pterosauria) der Oberjura-Plattenkalke Suddeutschlands, Teil II: Systematische Beschreibung. Palaeontographica Abteilung, A Band A 148:132–261
Rhamphorynchus_muensteri	CM 11428	Basal	Rhamphorhynchidae	95	68		44	64	20	100	92.5	86	81	30	42	NA		Wellnhofer 1975. Die Rhamphorhynchoidea (Pterosauria) der Oberjura-Plattenkalke Suddeutschlands, Teil II: Systematische Beschreibung. Palaeontographica Abteilung, A Band A 148:132–262
Rhamphorynchus_muensteri	MB	Basal	Rhamphorhynchidae	78.5	NA	NA	34	54.5	16.5	83	79.5	69	69	NA	37.4	NA		Wellnhofer 1975. Die Rhamphorhynchoidea (Pterosauria) der Oberjura-Plattenkalke Suddeutschlands, Teil II: Systematische Beschreibung. Palaeontographica Abteilung, A Band A 148:132–263
Rhamphorhynchus_sp.	BM 37012	Basal	Rhamphorhynchidae	28	21		NA	NA	NA	NA	NA	NA	NA	15	NA	NA	Juvenile	Wellnhofer 1975. Die Rhamphorhynchoidea (Pterosauria) der Oberjura-Plattenkalke Suddeutschlands, Teil II: Systematische Beschreibung. Palaeontographica Abteilung, A Band A 148:132–264
Rhamphorhynchus_sp.	BM 43004	Basal	Rhamphorhynchidae	NA	79		37	62	20	103	95	88	84	NA	NA	NA		Wellnhofer 1975. Die Rhamphorhynchoidea (Pterosauria) der Oberjura-Plattenkalke Suddeutschlands, Teil II: Systematische Beschreibung. Palaeontographica Abteilung, A Band A 148:132–265
Rhamphorhynchus_sp.	GPIH EIN.1	Basal	Rhamphorhynchidae	100	70		NA	NA	NA	NA	NA	NA	NA	NA	NA	NA		Wellnhofer 1975. Die Rhamphorhynchoidea (Pterosauria) der Oberjura-Plattenkalke Suddeutschlands, Teil II: Systematische Beschreibung. Palaeontographica Abteilung, A Band A 148:132–266
Rhamphorhynchus_sp.	SMS 3696	Basal	Rhamphorhynchidae	NA	NA	NA	NA	NA	NA	NA	NA	NA	NA	NA	NA	NA		Wellnhofer 1975. Die Rhamphorhynchoidea (Pterosauria) der Oberjura-Plattenkalke Suddeutschlands, Teil II: Systematische Beschreibung. Palaeontographica Abteilung, A Band A 148:132–267
Rhamphorhynchus_sp.	CM 11434	Basal	Rhamphorhynchidae	105	NA	NA	NA	NA	nn	NA	NA	NA	NA	NA	NA	NA		Wellnhofer 1975. Die Rhamphorhynchoidea (Pterosauria) der Oberjura-Plattenkalke Suddeutschlands, Teil II: Systematische Beschreibung. Palaeontographica Abteilung, A Band A 148:132–268
Rhamphorhynchus_sp.	PTH 1956.1	Basal	Rhamphorhynchidae	NA	NA	NA	35	58.5	?25	100	NA	NA	NA	NA	NA	NA		Wellnhofer 1975. Die Rhamphorhynchoidea (Pterosauria) der Oberjura-Plattenkalke Suddeutschlands, Teil II: Systematische Beschreibung. Palaeontographica Abteilung, A Band A 148:132–269
Rhamphorhynchus_sp.	PTH	Basal	Rhamphorhynchidae	NA	NA	NA	NA	NA	n	NA	NA	89	83.5	NA	NA	NA		Wellnhofer 1975. Die Rhamphorhynchoidea (Pterosauria) der Oberjura-Plattenkalke Suddeutschlands, Teil II: Systematische Beschreibung. Palaeontographica Abteilung, A Band A 148:132–270
Rhamphorhynchus_sp.	PTH 1955.135a	Basal	Rhamphorhynchidae	NA	NA	NA	37	59.5	19	99	92	85	83	31	43	NA		Wellnhofer 1975. Die Rhamphorhynchoidea (Pterosauria) der Oberjura-Plattenkalke Suddeutschlands, Teil II: Systematische Beschreibung. Palaeontographica Abteilung, A Band A 148:132–271
Rhamphorhynchus_sp.	PTH 1971.27	Basal	Rhamphorhynchidae	NA	NA	NA	?35	NA	NA	NA	NA	NA	NA	NA	NA	NA		Wellnhofer 1975. Die Rhamphorhynchoidea (Pterosauria) der Oberjura-Plattenkalke Suddeutschlands, Teil II: Systematische Beschreibung. Palaeontographica Abteilung, A Band A 148:132–272
Rhamphorhynchus_sp.	ES	Basal	Rhamphorhynchidae	NA	NA	NA	NA	64	20	102	97	88	86	NA	NA	NA		Wellnhofer 1975. Die Rhamphorhynchoidea (Pterosauria) der Oberjura-Plattenkalke Suddeutschlands, Teil II: Systematische Beschreibung. Palaeontographica Abteilung, A Band A 148:132–273
Rhamphorhynchus_sp.	RM St 18185	Basal	Rhamphorhynchidae	?87	NA	NA	36.5	60.5	20	101.5	92.5	85.5	75	27.3	41	NA		Wellnhofer 1975. Die Rhamphorhynchoidea (Pterosauria) der Oberjura-Plattenkalke Suddeutschlands, Teil II: Systematische Beschreibung. Palaeontographica Abteilung, A Band A 148:132–274
Rhamphorhynchus_sp.	SMF R4047	Basal	Rhamphorhynchidae	NA	NA	NA	NA	NA	NA	NA	NA	NA	NA	NA	46	23		Wellnhofer 1975. Die Rhamphorhynchoidea (Pterosauria) der Oberjura-Plattenkalke Suddeutschlands, Teil II: Systematische Beschreibung. Palaeontographica Abteilung, A Band A 148:132–275
Rhamphorhynchus_sp.	SMF R4125	Basal	Rhamphorhynchidae	NA	NA	NA	NA	NA	NA	NA	NA	NA	NA	NA	NA	NA		Wellnhofer 1975. Die Rhamphorhynchoidea (Pterosauria) der Oberjura-Plattenkalke Suddeutschlands, Teil II: Systematische Beschreibung. Palaeontographica Abteilung, A Band A 148:132–276
Rhamphorhynchus_sp.	SMS 12680	Basal	Rhamphorhynchidae	NA	66		NA	NA	NA	NA	NA	NA	NA	NA	NA	NA		Wellnhofer 1975. Die Rhamphorhynchoidea (Pterosauria) der Oberjura-Plattenkalke Suddeutschlands, Teil II: Systematische Beschreibung. Palaeontographica Abteilung, A Band A 148:132–277
Rhamphorhynchus_sp.	SL	Basal	Rhamphorhynchidae	NA	NA	NA	NA	56	18	89.5	82.3	74.8	76.7	NA	42	20.5		Wellnhofer 1975. Die Rhamphorhynchoidea (Pterosauria) der Oberjura-Plattenkalke Suddeutschlands, Teil II: Systematische Beschreibung. Palaeontographica Abteilung, A Band A 148:132–278
Rhamphorhynchus_sp.	SL	Basal	Rhamphorhynchidae	NA	67.5		NA	NA	NA	NA	93	NA	NA	NA	NA	NA		Wellnhofer 1975. Die Rhamphorhynchoidea (Pterosauria) der Oberjura-Plattenkalke Suddeutschlands, Teil II: Systematische Beschreibung. Palaeontographica Abteilung, A Band A 148:132–279
Rhamphorhynchus_sp.	MM	Basal	Rhamphorhynchidae	NA	NA	NA	39	63.5	NA	99	96.5	NA	NA	NA	NA	NA		Wellnhofer 1975. Die Rhamphorhynchoidea (Pterosauria) der Oberjura-Plattenkalke Suddeutschlands, Teil II: Systematische Beschreibung. Palaeontographica Abteilung, A Band A 148:132–280
Rhamphorhynchus_sp.	MM	Basal	Rhamphorhynchidae	NA	NA	NA	NA	NA	NA	NA	NA	NA	NA	NA	NA	NA		Wellnhofer 1975. Die Rhamphorhynchoidea (Pterosauria) der Oberjura-Plattenkalke Suddeutschlands, Teil II: Systematische Beschreibung. Palaeontographica Abteilung, A Band A 148:132–281
Rhamphorhynchus_sp.	MM	Basal	Rhamphorhynchidae	NA	NA	NA	NA	NA	NA	NA	NA	NA	NA	32.5	46.2	30.5		Wellnhofer 1975. Die Rhamphorhynchoidea (Pterosauria) der Oberjura-Plattenkalke Suddeutschlands, Teil II: Systematische Beschreibung. Palaeontographica Abteilung, A Band A 148:132–282
Rhamphorhynchus_sp.	PMZ A/III 109	Basal	Rhamphorhynchidae	NA	NA	NA	45.5	70	NA	NA	NA	NA	NA	NA	NA	NA		Wellnhofer 1975. Die Rhamphorhynchoidea (Pterosauria) der Oberjura-Plattenkalke Suddeutschlands, Teil II: Systematische Beschreibung. Palaeontographica Abteilung, A Band A 148:132–283
Rhamphorhynchus_sp.	MCZ 1504	Basal	Rhamphorhynchidae	NA	NA	NA	38	63	19	105	100.5	90.5	84	NA	NA	22.5		Wellnhofer 1975. Die Rhamphorhynchoidea (Pterosauria) der Oberjura-Plattenkalke Suddeutschlands, Teil II: Systematische Beschreibung. Palaeontographica Abteilung, A Band A 148:132–284
Rhamphorhynchus_sp.	SMD	Basal	Rhamphorhynchidae	NA	NA	NA	40	63.5	23	102	100	NA	NA	NA	NA	NA		Wellnhofer 1975. Die Rhamphorhynchoidea (Pterosauria) der Oberjura-Plattenkalke Suddeutschlands, Teil II: Systematische Beschreibung. Palaeontographica Abteilung, A Band A 148:132–285
Rhamphorhynchus_sp.	SMD	Basal	Rhamphorhynchidae	NA	NA	NA	NA	65	n	105	NA	NA	NA	NA	NA	NA		Wellnhofer 1975. Die Rhamphorhynchoidea (Pterosauria) der Oberjura-Plattenkalke Suddeutschlands, Teil II: Systematische Beschreibung. Palaeontographica Abteilung, A Band A 148:132–286
Rhamphorhynchus_sp.	SMS 9620	Basal	Rhamphorhynchidae	NA	NA	NA	35.5	58.5	21.5	95	92.7	85.3	82	NA	NA	NA		Wellnhofer 1975. Die Rhamphorhynchoidea (Pterosauria) der Oberjura-Plattenkalke Suddeutschlands, Teil II: Systematische Beschreibung. Palaeontographica Abteilung, A Band A 148:132–287
Rhamphorhynchus_sp.	NMINH F10172	Basal	Rhamphorhynchidae	66	49		22.25	39.4	16.2	56.57	51.51	47.46	53.53	18.17	26.25	12.15		Hone 2012. A new specimen of the pterosaur Rhamphorhynchus. Historical Biology 24: 581-585
Scaphognathus_crassirostris	GPIB 1304	Basal	Rhamphorhynchidae	116.5	99		53.5	94	27	70	75	NA	NA	55	NA	NA		Wellnhofer 1975. Die Rhamphorhynchoidea (Pterosauria) der Oberjura-Plattenkalke Suddeutschlands, Teil II: Systematische Beschreibung. Palaeontographica Abteilung, A Band A 148:132–288
Scaphognathus_crassirostris	Maxberg specimen	Basal	Rhamphorhynchidae	64.5	51		30	49	15	38	41	40	37	29	32.5	12	Juvenile, unfused cranium, scapula-coracoid, girdles, carpals and tarsals (Bennett 2014)	Wellnhofer 1975. Die Rhamphorhynchoidea (Pterosauria) der Oberjura-Plattenkalke Suddeutschlands, Teil II: Systematische Beschreibung. Palaeontographica Abteilung, A Band A 148:132–289
Scaphognathus_crassirostris	SMNS 59395	Basal	Rhamphorhynchidae	60	42.3	5.226	29	47.3	13.4	33.4	37.7	36.4	33.8	27.3	30.7	11.1	Juvenile	Bennett 2014 A new specimen of the pterosaur Scaphognathus crassirostris, with comments on constraint of cervical vertebrae number in pterosaurs. N. Jb. Geol. Paläont. Abh. 271:327–348
Sericipterus_wucaiwanensis	IVPP V14725	Basal	Rhamphorhynchidae	NA	NA	NA	100.2	>48.5	NA	127.4	117.4	>148.3	117.7	NA	NA	91.1		Andres et al 2010 A new rhamphorhynchid pterosaur from the Upper Jurassic of Xinjiang, China, and the phylogenetic relationships of basal pterosaurs. Journal of Vertebrate Paleontology 30: 163-187
Shenzhoupterus_chaoyangensis	HGM 41HIII - 305 A	Pterodactyloid	Chaoyanopteridae	224	217	22.12	66	106	140	147	100	68	36	102	139	39	Scapula-coracoid, and extensor tendon of 1st wing phalanx unfused. Syncarpals fused. Subadult	Lü et al. 2008 A new azdarchoid pterosaur from the Lower Cretaceous of China and its implications for pterosaur phylogeny and evolution. Naturwissenchaften 95: 891-897
Sinopterus_dongi	D2525	Pterodactyloid	Tapejaridae	NA	NA	NA	109	154	170	215	156	106	43	135	185	40		Lü et al. 2006 New material of the pterosaur Sinopterus (Reptilia: Pterosauria) from the Early Cretaceous Jiufotang Formation, Western Liaoning, China. Acta Geologica Sinica 80: 783-789
Sinopterus_dongi	IVPP V13363	Pterodactyloid	Tapejaridae	146	125	14.17	59	88	95	121	91	65.5	33	74	104	25		Wang & Zhou 2003 A new pterosaur (Pterodactyloidea, Tapejaridae) from the Early Cretaceous Jiufotang Formation of western Liaoning and its implications for biostratigraphy. Chinese Science Bulletin 48: 16-23.
Sordes_pilosus	PIN 2585/3	Basal	Pterodactylomorpha	~80	NA		43.1	69.1	16.5	50.5	53	53.8	33.9	36	49.6	14.8		Unwin et al. 2000 On the systematic and stratigraphic significance of pterosaurs from the Lower Cretaceous Yixian Formation (Jehol Group) of Liaoning, China. Mitt. Mus. Nat.kd. Berl., Geoziss. Reihe 3:181-206; Wellnhofer 1978. Pterosauria. Springer Verlag, Stuttgart
Tapejara_navigans	SMNK PAL 2344	Pterodactyloid	Tapejaridae	375	NA	NA	NA	NA	NA	NA	NA	NA	NA	NA	NA	NA		Frey et al. 2003 A new species of tapejarid pterosaur with soft-tissue head crest. From: BUFFETAUT, E. & MAZIN, J-M. (eds) 2003. Evolution and Palaeobiology of Pterosaurs. Geological Society, London, Special Publications, 217, 65-72
Thalassodromeus_sethi	DGM 1476-R	Pterodactyloid	Thalassodrominae	798	710		NA	NA	NA	NA	NA	NA	NA	NA	NA	NA		Kellner & Campos 2002 The function of the cranial crest and jaws of a unique pterosaur from the Early Cretaceous of Brazil. Science 297: 389-392
Tropeognathus_mesembrinus	BSP 1987 I 46	Pterodactyloid	?	630	540		NA	NA	NA	NA	NA	NA	NA	NA	NA	NA		Wellnhofer 1987 New crested pterosaurs from the Lower Cretaceous of Brazil. Mitteilungen der Bayerischen Staatssammlung für Paläontologie und Histor. Geologie 27:175-186
Tropeognathus_mesembrinus	BSP 1987 I 47	Pterodactyloid	?	NA	560		NA	NA	NA	NA	NA	NA	NA	NA	NA	NA		Wellnhofer 1987 New crested pterosaurs from the Lower Cretaceous of Brazil. Mitteilungen der Bayerischen Staatssammlung für Paläontologie und Histor. Geologie 27:175-186
Tupandactylus_imperator	CPCA 3590	Pterodactyloid	Tapejaridae	NA	305		NA	NA	NA	NA	NA	NA	NA	NA	NA	NA		Pinheiro et al 2011 New information on the pterosaur Tupandactylus imperator, with comments on the relationships of Tapejaridae. Acta Palaeontologica Polonica, 56:567-580
Volgadraco_bogolubovi	SGU, no. 46/104a	Pterodactyloid	Azdarchidae	NA			NA	NA	NA	NA	NA	NA	NA	NA	NA	NA		Averianov et al. 2008 New Late Cretaceous Azhdarchid (Pterosauria, Azhdarchidae) from the Volga Region. Paleontological Journal 41(2):189-197
Wenupteryx_uzi	MOZ 3625P	Pterodactyloid	Euctenochasmatia	NA	NA	NA	65	88	67	95		NA	NA	66	85	NA	Subadult	Codorniú et al. 2006 A late Jurassic pterosaur (Reptilia, Pterodactyloidea) from northwestern Patagonia, Argentina. Journal of South American Earth Sciences 20: 383-389.
Wukongopterus_lii	IVPP V15113	Basal	Wukongopteridae	NA	103.2	6.12	38.7	62.1	22.9	45.7	56.8	59.3	51.4	35.6	52.8	17.2	Scapula-coracoid, notarium and carpals unfused	Wang et al. 2009 An unusual long-tailed pterosaur with elongated neck from western Liaoning of China. Anais da Academia Brasileira de Ciências 81: 793-812.
Zhejiangopterus_linhaiensis	M1330	Pterodactyloid	Azdarchidae	287	250	19	NA	NA	NA	NA	NA	NA	NA	NA	NA	NA		Cai & Wei 1994 Zhejiangopterus linhaiensis (Pterosauria) from the Upper Cretaceous of Linhai, Zhejiang, China. Vertebrata PalAsiatica 32: 181-194
Zhejiangopterus_linhaiensis	M1323	Pterodactyloid	Azdarchidae				137	234	336	322	220	NA	NA	222	265			Cai & Wei 1994 Zhejiangopterus linhaiensis (Pterosauria) from the Upper Cretaceous of Linhai, Zhejiang, China. Vertebrata PalAsiatica 32: 181-194
Zhejiangopterus_linhaiensis	M1328	Pterodactyloid	Azdarchidae				106	164	NA	NA	NA	NA	NA	122	185	NA		Cai & Wei 1994 Zhejiangopterus linhaiensis (Pterosauria) from the Upper Cretaceous of Linhai, Zhejiang, China. Vertebrata PalAsiatica 32: 181-194
Zhejiangopterus_linhaiensis	M1325	Pterodactyloid	Azdarchidae				90	130	NA	NA	NA	NA	NA	168	NA	NA		Cai & Wei 1994 Zhejiangopterus linhaiensis (Pterosauria) from the Upper Cretaceous of Linhai, Zhejiang, China. Vertebrata PalAsiatica 32: 181-194
Zhenyuanopterus_longirostris	GLGMV 0001	Pterodactyloid	Boreopterinae	545	495	32.5	210	262	230	360	275	210	19	210	200	26	Scapula and coracoid not fused. Premaxilla and maxilla fused	Lü 2010 A new boreopterid pterodactyloid pterosaur from the Early Cretaceous Yixian Formation of Liaoning Province, Northeastern China. Acta Geologica Sinica 84: 241-246
